# Supplementary material
Source: PubMed Central journal article supplement (PMC8638397)
Supplement: ASN.2021040431SupplementaryData.pdf [file ASN.2021040431SupplementaryData.pdf]

## Supplementary data

### CHOP-ASO ameliorates glomerular and tubular damage on top of ACE-inhibition in diabetic kidney disease

Khurram Shahzad<sup>1\*</sup>, Sameen Fatima<sup>1,2\*</sup>, Moh'd Mohanad Al-Dabet<sup>1,3</sup>, Ihsan Gadi<sup>1</sup>, Hamzah Khawaja<sup>1</sup>, Saira Ambreen<sup>1</sup>, Ahmed Elwakiel<sup>1</sup>, Nora Klötting<sup>4</sup>, Matthias Blüher<sup>4,5</sup>, Peter P. Nawroth<sup>6</sup>, Peter R. Mertens<sup>7</sup>, Sven Michel<sup>8</sup>, Frank Jaschinski<sup>8</sup>, Richard Klar<sup>8</sup>, Berend Isermann<sup>1</sup>

Running headline: CHOP-ASO in DKD

<sup>1</sup> Institute of Laboratory Medicine, Clinical Chemistry and Molecular Diagnostic, University Hospital, Leipzig, 04103 Leipzig, Germany

<sup>2</sup> Institute of Experimental Internal Medicine, Medical Faculty, Otto von Guericke University, Leipziger Str. 44, 39120 Magdeburg, Germany

<sup>3</sup> Department of Medical Laboratories, Faculty of Health Sciences, American University of Madaba (AUM), Amman 11821, Jordan

<sup>4</sup> Helmholtz Institute for Metabolic, Obesity and Vascular Research (HI-MAG) of the Helmholtz Zentrum München at the University of Leipzig, 04103 Leipzig, Germany

<sup>5</sup> Medical Department III, Endocrinology, Nephrology, Rheumatology, University of Leipzig Medical Center, 04103 Leipzig, Germany

<sup>6</sup> Internal Medicine I and Clinical Chemistry, German Diabetes Center (DZD), University of Heidelberg, 69120 Heidelberg, Germany

<sup>7</sup> Clinic of Nephrology and Hypertension, Diabetes and Endocrinology, Otto-von-Guericke University, Magdeburg, Germany

<sup>8</sup> Secarna Pharmaceuticals GmbH & Co. KG, Am Klopferspitz 19, 82152 Planegg, Germany

\*Equally contributing authors.

**Corresponding authors:** Khurram Shahzad, PhD and Berend Isermann, MD  
Institute of Laboratory Medicine, Clinical Chemistry  
and Molecular Diagnostic (ILM),  
Paul-List-Straße 13/15, 04103  
Leipzig, Germany

Phone: 49 – (0)341 –9722200

Fax: 49 – (0)341 –9722209

e-mail: khurram.shahzad@medizin.uni-leipzig.de and berend.isermann@medizin.uni-leipzig.de

## Table of Contents for the Supplemental Material

|                                    |
|------------------------------------|
| Supplementary Material and Methods |
| Supplementary Figures 1-9          |
| Supplementary Tables 1,2           |
| Major Resource Table               |
| Supplementary References           |

## Supplementary Material and Methods

### Reagents

The following antibodies were used in the current study: rabbit polyclonal anti-TIM-1 (T-cell transmembrane, immunoglobulin, and mucin; also known as KIM-1) and donkey anti-rabbit IgG H&L (Alexa Fluor® 594) from Abcam, Germany; mouse monoclonal anti-ATF6 and rabbit polyclonal anti-GADD153/CHOP from Novusbio, Germany; rabbit polyclonal anti-SGLT2 from Invitrogen, Germany; mouse anti-CD133 antibody from Biorbyt, United Kingdom; mouse anti-synaptopodin from Santa Cruz Biotechnology Inc., United States; rabbit polyclonal rabbit monoclonal anti-GAPDH from Sigma-Aldrich, Germany. HRP- or FITC-conjugated secondary antibodies to mouse and rabbit IgG from Cell Signaling; Donkey anti-Mouse IgG (H+L) highly cross-adsorbed secondary antibody, Alexa Fluor 488 from Thermo Fisher Scientific, Germany; TEXAS RED anti-rabbit from Jackson ImmunoResearch Laboratories, Inc, Germany. Other reagents used in the current study were as follows: HOECHST 33258, Masson's trichrome staining kit, donkey serum and sulfamethazine (broad spectrum antibiotic), Sigma-Aldrich, Germany; mouse albumin ELISA quantification kit, Bethyl Laboratories, Germany; DMEM, RPMI, Trypsin-EDTA, penicillin, streptomycin, FCS, FBS, ITS supplement and Hepes, PAA Laboratories, Germany; IFN- $\gamma$ , Cell Sciences; Accu-Chek test strips, Accu-Check glucometer, and protease inhibitor cocktail, Roche Diagnostics, Germany; TrueBlack® Lipofuscin autofluorescence quencher from Biotium, United States; BCA reagent, Perbio Science; Vectashield mounting medium and DAB reagent, Vector Laboratories, United States; PVDF membrane and immobilon™ western chemiluminescent HRP substrate, Millipore, United States ; periodic acid-Schiff reagent, Haemotoxylin, and powdered milk ROTH, Germany.

### Antisense oligonucleotides

15-, 16- and 17-mer antisense oligonucleotides specific for human or mouse DDIT3 (Chop) were selected based on the respective RNA sequences. Main criterion for sequence selection was selectivity to avoid undesired off-target effects. LNA-modified Gapmers were ordered from Exiqon or Axolabs and dissolved in H<sub>2</sub>O (stock concentration 1 mM). Antisense oligonucleotides were added to cells without the use of a transfection reagent *in vitro* and without any delivery system *in vivo*.

Sequences of ASOs and the control oligonucleotides used in the study:

| ASO ID          | Sequence                                               | Description                                                                           |
|-----------------|--------------------------------------------------------|---------------------------------------------------------------------------------------|
| Chop ASO 1      | +T*+A*+C*G*C*T*C*A*G*T*G*C*C*T*+T*+A*+G                | Used for <i>in vitro</i>                                                              |
| Chop ASO 2      | +T*+G*+A*T*A*C*G*C*T*C*A*G*T*G*+C*+C*+T                | Used for <i>in vitro</i>                                                              |
| ChA             | +C*+T*+A*G*C*T*G*T*G*C*C*A*C*+T*+T*+T                  | Used for <i>in vivo</i>                                                               |
| Control oligo 1 | +C* + G* + T*T*T*A*G*G*C*T*A*T*G*T*A* + C*<br>+ T* + T | Control oligonucleotide <sup>1</sup> ,<br>Used for <i>in vivo</i> and <i>in vitro</i> |

+ indicates LNA-modified nucleotides and \* indicates PTO linkages

### **Histology and immunohistochemical analysis**

Freshly sacrificed mice were perfused first with ice cold PBS and then with 4% buffered paraformaldehyde<sup>2-5</sup>. Tissues were further fixed with 4% buffered paraformaldehyde for 2 days, embedded in paraffin and processed for sectioning. Extracellular matrix deposition in glomeruli was assessed by Periodic acid–Schiff staining. The fractional mesangial area (FMA) was calculated following the current DCC (Diabetes Complications Consortium) protocol. Briefly, 5 µm thick sections were stained with Periodic Acid-Schiff reagent. At least 50 different superficial glomeruli per mouse were randomly chosen for analysis. For every investigated glomerulus, total glomerular area and glomerular tuft area were determined by tracing the outline of the Bowman's capsule and the tuft, respectively, using ImageJ. The FMA was calculated as the percentage of the glomerular area relative to the tuft area<sup>5, 6</sup>. For determination of the tubular diameter adjacent sections were compared to ensure that a sagittal tubular cross-section was analyzed. At least 30 randomly chosen tubules were analyzed per mouse using ImageJ software. Immunohistochemical detection of GADD153/CHOP, KIM-1 and ATF6α were performed using specific primary and appropriate secondary antibodies, incubated in 5 % bovine serum albumin (BSA). For immunohistochemical detection of SGLT2, 10 % donkey serum (as secondary antibody has been raised in donkey) was used as blocking solution and for the antibodies dilution. Additionally, sections were incubated with TrueBlack® Lipofuscin autofluorescence quencher (Biotium, Germany), 1X solution in 70 % ethanol for 30 sec at room temperature to reduce background. Control images, obtained following incubation with only primary or only secondary antibody, were used for background correction. Immunohistochemistry and immunofluorescence images were captured with an Olympus Bx43-Microscope (Olympus, Hamburg, Germany). The Image Pro Plus software (version 6.0) and Image J software were used for image analysis. All histological analyses were performed by two independent blinded investigators.

### **Transmission Electron Microscopy**

Ultrastructural images of the glomerular filtration barrier were obtained by transmission electron microscopy as previously described<sup>3, 4</sup>. Renal tissues were fixed with a mix of 2.5 % glutaraldehyde, 2.5 % polyvidone 25, and 0.1 M sodium cacodylate (pH 7.4). After washing with 0.1 M sodium cacodylate buffer (pH 7.4), samples were postfixed in the same buffer containing 2 % osmium tetroxide and 1.5 % potassium ferrocyanide for 1 hour, washed in water, contrasted en bloc with uranyl acetate, dehydrated using an ascending series of ethanol, and embedded in glycidyl ether 100-based resin. Ultrathin sections were cut with a Reichert Ultracut S ultramicrotome (Leica Microsystems, Wetzlar, Germany), contrasted with uranyl acetate and lead citrate, and were viewed with an EM 10 CR electron microscope (Carl Zeiss NTS, Oberkochen, Germany). Thickness of the glomerular basement membrane (GBM) was analyzed using ImageJ software. For each image, the basement membrane thickness was determined at 15 adjacent and evenly distributed locations. To assess the degree of foot process effacement (FPE), the length of the GBM on each micrograph was measured and the number of foot processes per µM GBM was subsequently calculated.

### **Masson's trichrome staining**

Freshly sacrificed mice were perfused first with ice cold PBS and then with 4 % buffered paraformaldehyde. Tissues were further fixed with 4 % buffered paraformaldehyde for 2 days, embedded in paraffin and processed for sectioning. Masson's trichrome staining (Sigma-Aldrich, Germany) was performed according to the manufacturer's instructions<sup>4, 7</sup>. Tissue sections (4 µm thickness) were postfixed in preheated Bouin's solution (Sigma-Aldrich, Germany) at 56°C for 15 min, Weigert's iron hematoxylin solution for 5 min, Biebrich scarlet acid/fuchsin solution for 5 min, 5 % phosphotungstic/phosphomolybdic acid for 5 min, aniline blue solution for 20 min and 1 % acetic acid for 2 min. Between every staining step, the tissue sections were washed with distilled water. For histological analysis, images were captured with an Olympus Bx43 microscope (Olympus, Hamburg, Germany), and ImageJ software was used for image analysis. All histological analyses were done by an independent blinded investigator.

### **Analyses of blood samples**

Blood samples were obtained from the inferior vena cava of 22-week-old anticoagulated mice (500 U of unfractionated heparin via intraperitoneal injection before blood sampling). Heparinized plasma was obtained by centrifugation of blood samples for 10 minutes at 2000 x g at 4°C. Plasma samples were stored at -80°C until analyses. Plasma angiotensin II was determined using a mouse Angiotensin II ELISA (Sigma Aldrich) according to the manufacturer's instructions<sup>4</sup>. Plasma levels of ALT (alanine aminotransferase, U/l) and AST (aspartate aminotransferase, U/l) were measured using an enzymatic reaction on the Cobas C111 Chemistry System from Roche, Germany.

### **Blood pressure measurement**

Blood pressure was measured using a noninvasive mouse tail-cuff blood pressure analysis system (CODA; Kent Scientific Corporation)<sup>8</sup>.

### **Immunoblotting**

Proteins were isolated and immunoblotting was performed as described<sup>2-5, 7</sup>. In brief, cell lysates were prepared in RIPA buffer (50 mM Tris at pH 7.4, 1 % Nonidet P-40, 0.25 % sodium deoxycholate, 150 mM NaCl, 1 mM EDTA, 1 mM Na<sub>3</sub>VO<sub>4</sub>, and 1 mM NaF supplemented with protease inhibitor cocktail). Lysates were centrifuged (10000 × g for 10 min at 4°C) and insoluble debris was discarded. The protein concentration in supernatants was quantified using BCA reagent. Equal amounts of protein were electrophoretically separated on 10 % (vol/vol) or 12.5 % (vol/vol) SDS polyacrylamide gels, transferred to PVDF membranes, and probed with the desired primary antibodies overnight at 4°C. Membranes were then washed with TBST and incubated with anti-mouse (1:2000), anti-rat IgG (1:2000) or anti-rabbit IgG (1:2000) horseradish peroxidase-conjugated antibodies, as indicated. Blots were developed with the enhanced chemiluminescence system. To compare and quantify levels of proteins, the density of each band was measured using ImageJ software. Equal loading was confirmed by immunoblotting with GAPDH antibody.

### **Detection of cell death by TUNEL Assay**

Terminal deoxynucleotidyl transferase (TdT) dUTP Nick- End Labeling (TUNEL) assays on tissue sections were done according to the manufacturer's instructions. Briefly, sections were rehydrated, treated for eight min with PBS containing 0.1% Triton and 0.1% M sodium citrate, and incubated with terminal deoxynucleotidyl transferase in the presence of biotinylated dUTP (Biotin-dUTP) (60 min at 37°C). The tissue sections were washed 2-times with PBS for 5 min each. Sections were then incubated with horseradish peroxidase-labeled streptavidin (Streptavidin-HRP). The tissue sections were again washed 2-times with PBS for 5 min each. Dead cells were detected by HRP-DAB (3,3'-diaminobenzidine) reaction. Sections were counterstained with hematoxylin. Images were captured with an Olympus Bx43 microscope (Olympus, Hamburg, Germany), and ImageJ software was used for image analysis. The frequency of dead cells was determined by a blinded investigator by counting TUNEL positive cells and total cell number and calculating the percentage of TUNEL positive cells<sup>2, 5</sup>.

### **Cell culture**

Human renal proximal tubular (HKC-8) cells and embryonic kidney (HEK-293) cells were routinely grown and maintained in DMEM low glucose (5.5 mM glucose concentration) RPMI growth medium in the presence of 10 % FBS at 37°C according to manufacturer's instructions (ATCC, USA). Conditionally immortalized human podocytes were cultured as described previously<sup>2, 3, 5</sup>. In brief, podocytes were routinely grown on plates coated with collagen type 1 at 33°C in the presence of interferon  $\gamma$  (10 U/ml) to enhance expression of the thermosensitive T antigen. Under these conditions, cells proliferate and remain undifferentiated. To induce differentiation, podocytes were grown at 37°C in the absence of interferon  $\gamma$  for 14 days. Experiments were performed after 14 days of differentiation. HEK-293 cells and podocytes were maintained in high concentration of glucose (25 mM) for 24 h. CHOP-ASO (10  $\mu$ M) or Control-ASO (10  $\mu$ M) were added 24 h before exposure to the high glucose medium. Cell exposed to mannitol (20 mM) plus normal glucose concentration (5.5 mM glucose) served as controls.

### **RNA-seq, functional annotation and pathway analysis**

RNA was extracted from renal tissue samples that were stored in RNAlater using Qiagen RNeasy mini kit plus according to the manufacturer's instructions. Preparation of RNA libraries and the subsequent RNA sequencing was carried out by Genomescan (Leiden, The Netherlands). RNA samples were processed using the NEBNext Ultra II Directional RNA Library Prep Kit for Illumina according to the manufacturer's protocol (NEB #E7760S/L). Briefly, rRNA depletion kit (NEB# E6310) was used to filter rRNA from total RNA. cDNA was synthesized after fragmentation of the rRNA-reduced-RNA, which was used for ligation with the sequencing adapters and PCR amplification of the resulting product. Fragment Analyzer was used to assess quality and yield of the sample preparation. As expected the size distribution of the resulting products in general showed a broad peak between 300-500 bp. Clustering and DNA sequencing was performed according to manufacturer's protocols on an Illumina NovaSeq6000 using a concentration of 1.1 nM of cDNA. Illumina data analysis pipeline RTA3.4.4 and Bcl2fastq (version: v2.20) was used for image analysis, base calling, and quality check.

RNA sequencing data was provided from Genomescan in FASTQ format. FASTQ-files were investigated using fastQC (<http://www.bioinformatics.babraham.ac.uk/projects/fastqc/>) before and after trimming. Version 0.36 of trimmomatic<sup>9</sup> was used to filter low quality reads and to cut TruSeq adapter sequences. FASTQ Screen<sup>10</sup> (version: v0.14.0) was additionally applied on every FASTQ file to investigate and visualize the sequence reads. Salmon<sup>11</sup> was used based on gencode release m24<sup>10</sup> setting the flags gcBias and validate Mappings to quantify gene expression. To prepare the data for differential gene expression analysis the packages tximport<sup>12</sup> and GenomicFeatures<sup>13</sup> in R were utilized. Subsequent analysis was performed using DESeq2 package (1.24.0)<sup>1</sup>. To calculate and visualize the PCA (principal component analysis), the specific function plotPCA was used in combination with ggplot2 (3.3.0, <https://link.springer.com/book/10.1007%2F978-3-319-24277-4>). As only two samples of the ChA+E group passed QC for the RNA-seq experiments, all results based on analyses involving this group need to be treated with caution.

Pathway analysis was conducted applying the fora function of the fgsea (1.10.1) Bioconductor package [<https://doi.org/10.1101/060012>] using the 'BeFree gene-disease associations' gene sets downloaded from the DisGeNET database (<http://www.disgenet.org/>)<sup>14</sup> in Feb 2021). Only gene sets containing more than 10 genes were used for analysis. Heatmap was plotted using pheatmap (1.0.12) [Kolde R: pheatmap: Pretty Heatmaps. 2019. R package version 1.0.12. <https://CRAN.R-project.org/package=pheatmap> and venn diagrams were drawn using VennDiagram (1.6.20)<sup>15</sup>.

### **RNAseq data access**

RNA-Seq data have been deposited in the NCBI public database (BioProject accession number PRJNA721721). The data is available at <https://dataview.ncbi.nlm.nih.gov/object/PRJNA721721?reviewer=oe4em1df5qhnkikmu82v64cm3i>.

## Supplementary Fig.1

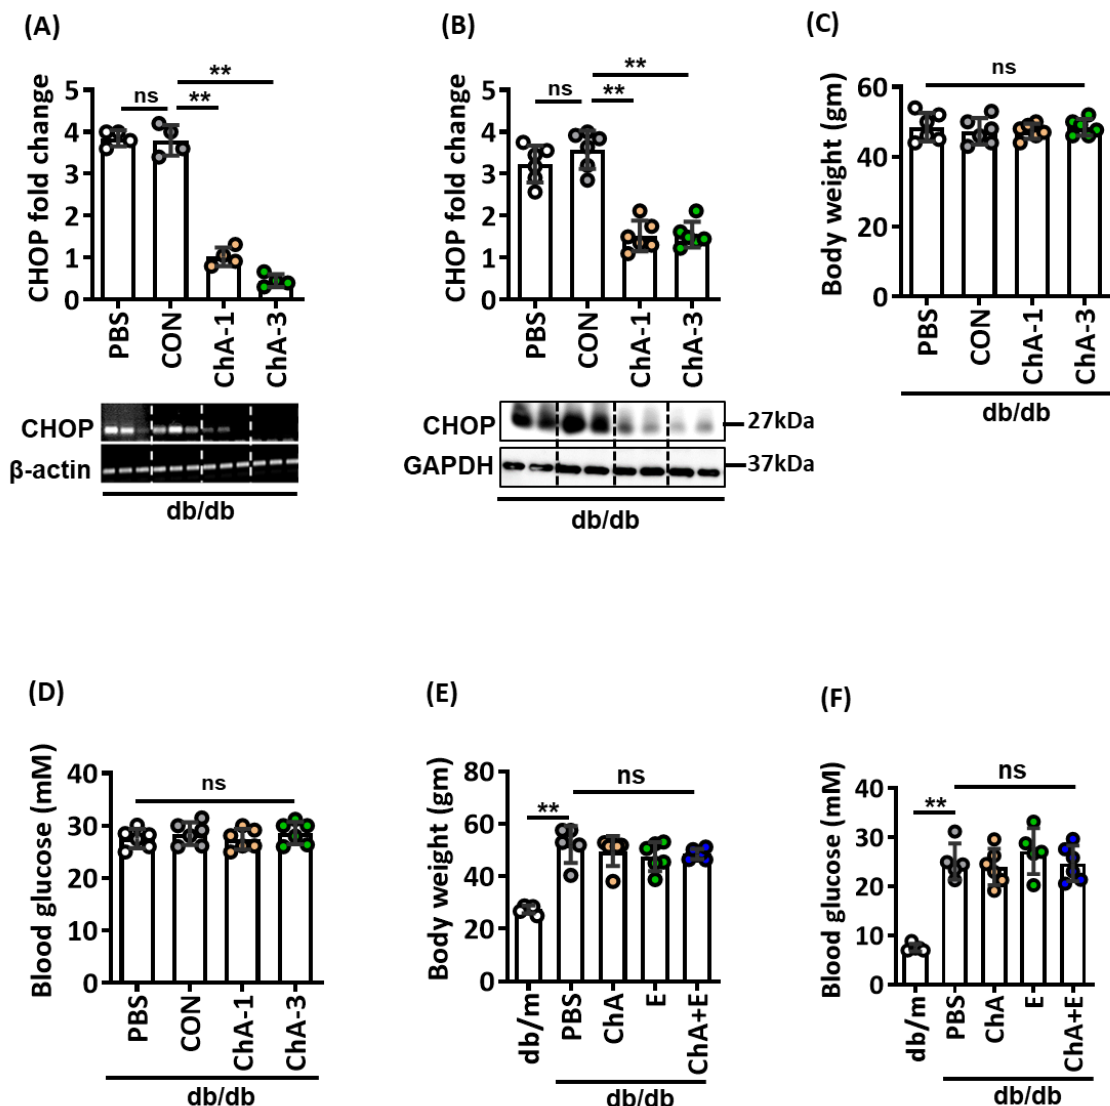

### Supplementary Figure 1 (corresponding to Figure 1).

**A, B:** Scatter plot with bars summarizing renal mRNA (**A**, bottom: representative reverse-transcriptase-PCR gel images,  $\beta$ -actin was used for normalization) and protein (**B**, bottom: representative immunoblot images of CHOP, GAPDH was used for normalization) expression of CHOP in the dose escalation studies.

**C, D:** Scatter plot with bars summarizing mouse body weights (**C**) and blood glucose levels (**D**) for the CHOP-ASO dose escalation experiment.

**E, F:** Scatter plot with bars summarizing mouse body weights (**E**) and blood glucose levels (**F**) after treatment with CHOP-ASO (ChA), ACEi (E) or CHOP-ASO plus ACEi (ChA + E) for the disease prevention study initiated in 8-week-old db/db mice.

Nondiabetic healthy mice (db/m, 16 weeks old) and 16-week-old diabetic db/db mice treated for 8 weeks (starting at the age of 8 weeks) with PBS (PBS); nonspecific control oligonucleotide (CON); CHOP-ASO (ChA) at concentrations of 1 mg/kg (ChA-1) or 3 mg/kg (ChA-3); the ACE inhibitor enalapril (ACEi, E) or a combination of CHOP-ASO plus enalapril (ChA+E). \* $P < 0.05$ , \*\* $P < 0.01$ , NS, nonsignificant (ANOVA); each dot in scatter plots represents one sample.



## Supplementary Figure 2

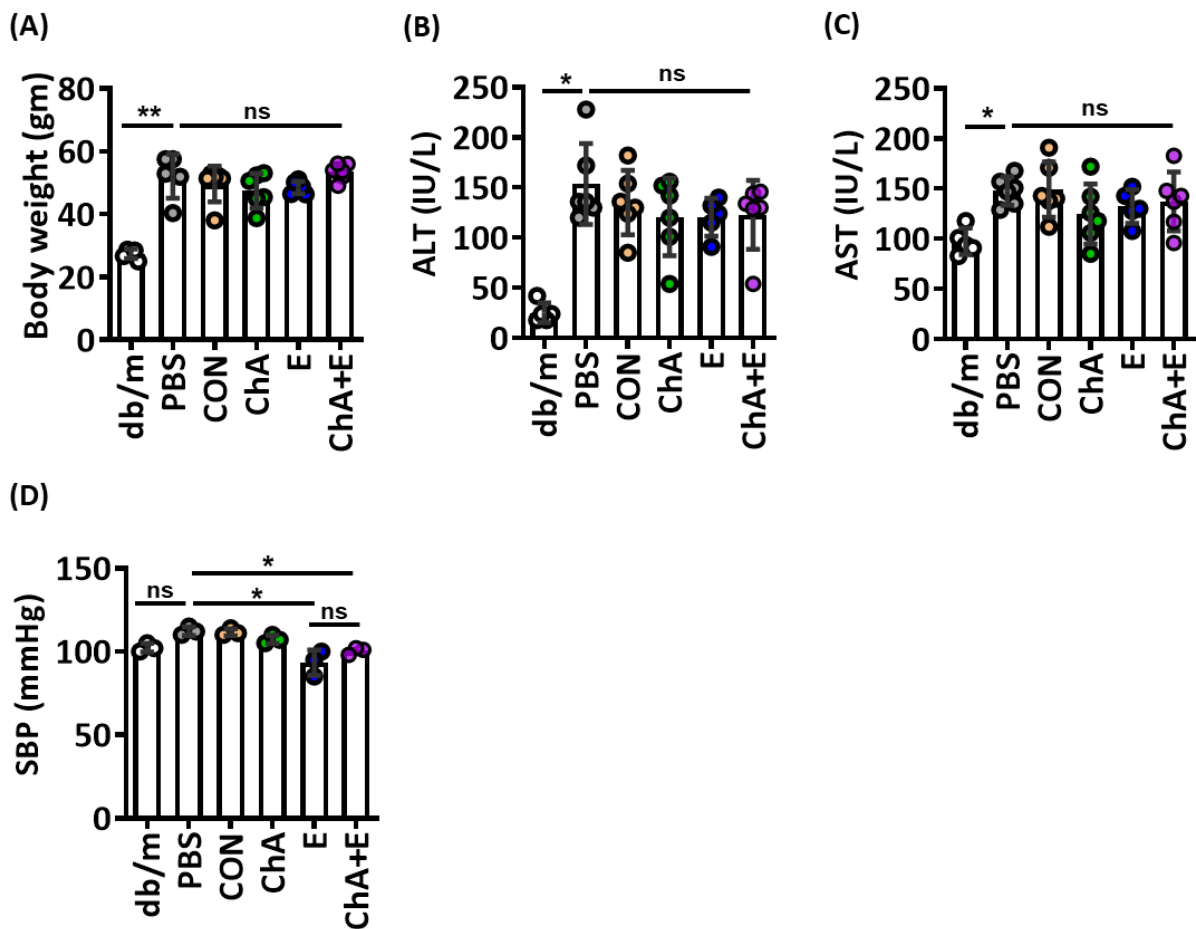

### Supplementary Figure 2 (corresponding to Figure 2).

Scatter plots with bars summarizing mouse body weights (A), liver alanine transaminase (ALT, B), aspartate transaminase (AST, C), and systolic blood pressure (D).

In A-C, data of nondiabetic mice (db/m, 22 weeks old) and 22-week-old diabetic db/db mice treated for 6 weeks (starting at the age of 16 weeks) with PBS (PBS), nonspecific control oligonucleotide (CON), CHOP-ASO (ChA), the ACE inhibitor enalapril (ACEi, E) or a combination of CHOP-ASO plus enalapril (ChA+E) are shown. In D, same groups are shown, but mice are age 16 weeks when analyzed and interventions were initiated at age 12 weeks for further 4 weeks. \*\* $P < 0.05$ , \*\*\* $P < 0.01$ , ns, nonsignificant (A-D; ANOVA); each dot in scatter plots represents one sample.

### Supplementary Figure 3

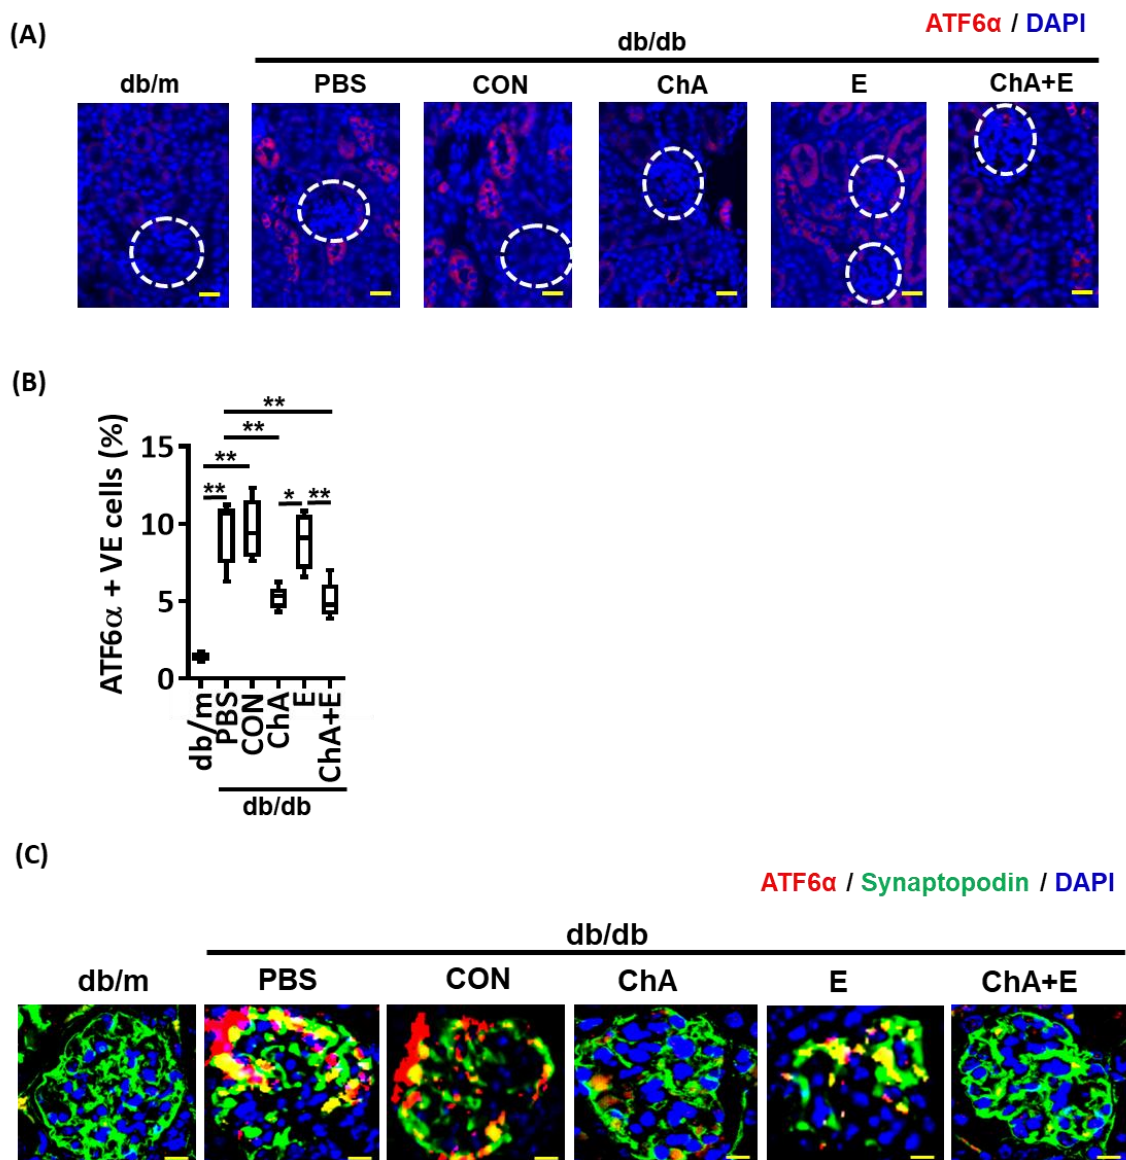

#### Supplementary Figure 3 (corresponding to Figure 4).

**A,B:** Representative immunofluorescence staining images of renal ATF6 $\alpha$  (A, glomeruli indicated by the white dashed circles). ATF6 $\alpha$ -positive cells are red, and DAPI (blue) represents nuclear counterstaining. Scale bar = 50 $\mu$ m. Scatter plot with bars summarizing the frequency of ATF6 $\alpha$  (B)-positive renal cells using ATF6 $\alpha$  immunofluorescence staining.

**C:** Representative co-immunofluorescence images showing colocalization of ATF6 $\alpha$  (red) with synaptopodin (green) in glomeruli (C). Scale bar = 20 $\mu$ m.

Nondiabetic healthy mice (db/m, 22 weeks old) and 22-week-old diabetic db/db mice treated for 6 weeks (starting at the age of 16 weeks) with PBS (PBS), nonspecific control oligonucleotide (CON), CHOP-ASO (ChA), the ACE inhibitor enalapril (ACEi, E) or a combination of CHOP-ASO plus enalapril (ChA+E). Scale bar, 20  $\mu$ m (A); \* $P$ <0.05, \*\* $P$ <0.01 (C, E: ANOVA); each dot in scatter plots represents one sample.

## Supplementary Figure 4

Neg. control

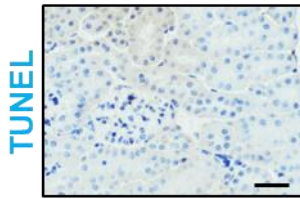

### Supplementary Figure 4 (corresponding to Figure 5).

Representative TUNEL staining (negative control) of renal histologic sections. Renal sections incubated only with label mix solution in the absence of terminal deoxynucleotidyl transferase (TdT) served as negative controls for TUNEL staining. TUNEL staining is indicated by brown coloring, with TUNEL-positive cells detected by the HRP-DAB reaction. Blue shows the hematoxylin counterstain. Scale bar, 50  $\mu\text{m}$ .

Supplementary Figure 5

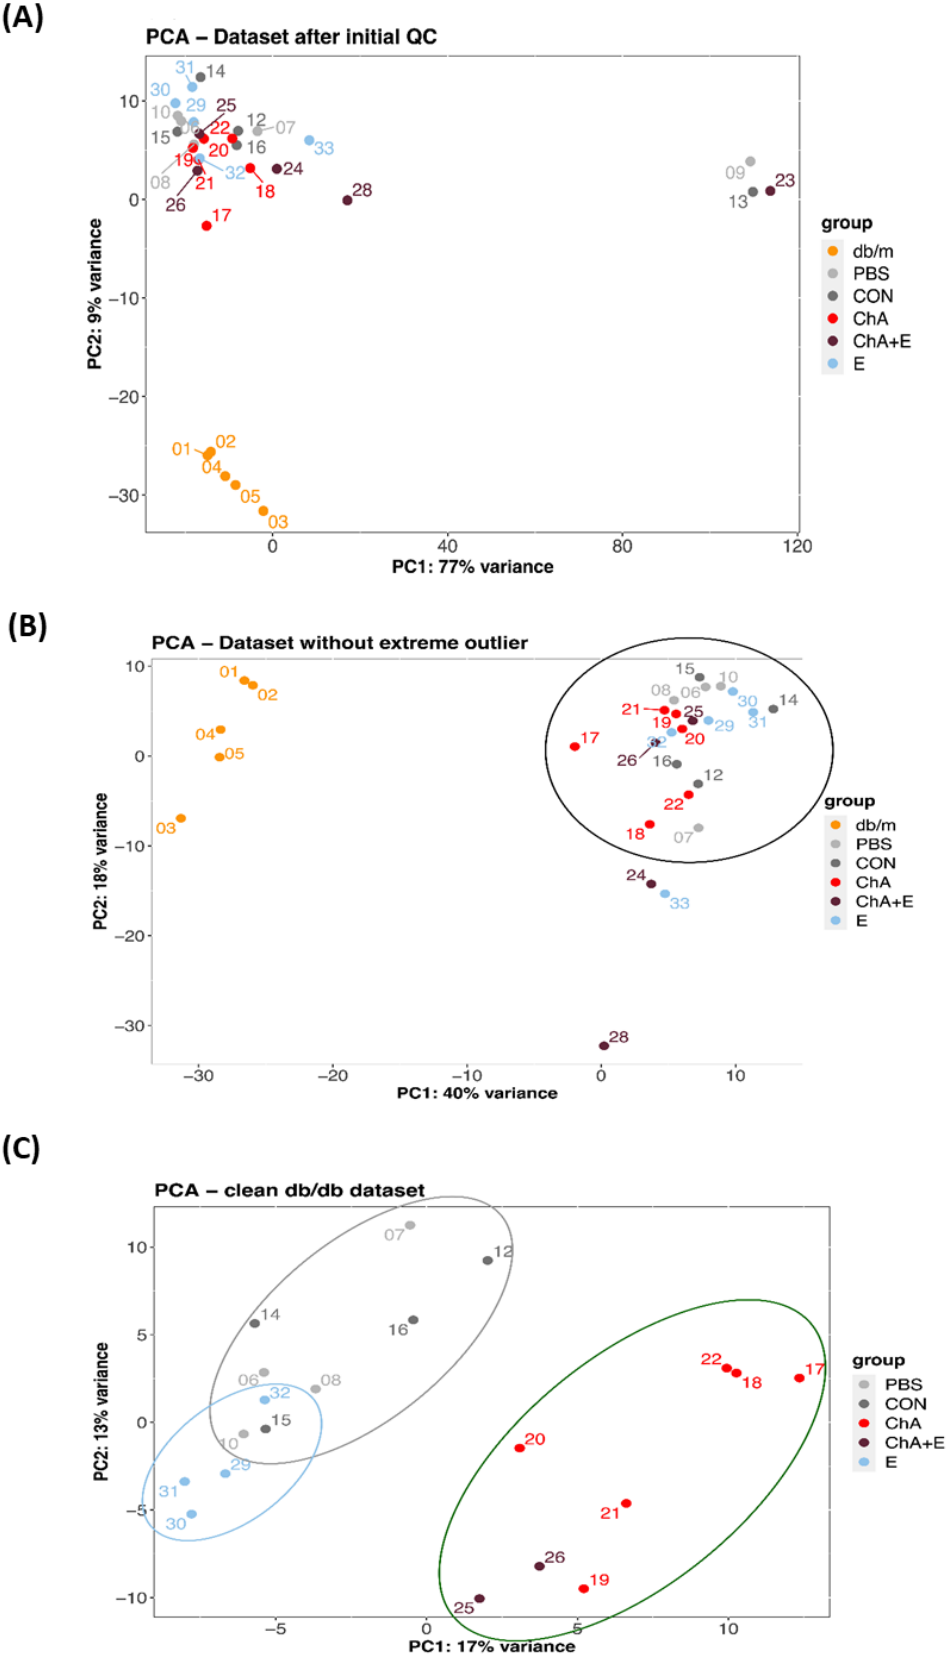

Supplementary Figure 5. A, B, C: Principle component analyses (PCA) showing the distribution of samples across various treatment groups for the RNA-seq dataset. (A) Initial dataset. Three samples were excluded due to low

quality of the tissue and unusually high GC content. **(B)** Dataset without the extreme outliers. Extreme outliers 09, 13 and 23 were excluded. **(C)** Clean db/db dataset. db/m control mice were excluded. Furthermore, due to high variance compared to mice with the same genetic background (db/db), samples 24, 28 and 33 were excluded. PC1; first principal component and PC2; second principal component.

Nondiabetic healthy mice (db/m, 22 weeks old) and 22-week-old diabetic db/db mice treated for 6 weeks (starting at the age of 16 weeks) with PBS (PBS), nonspecific control oligonucleotide (CON), CHOP-ASO (ChA), the ACE inhibitor enalapril (ACEi, E) or with a combination of CHOP-ASO plus enalapril (ChA+E).

## Supplementary Figure 6

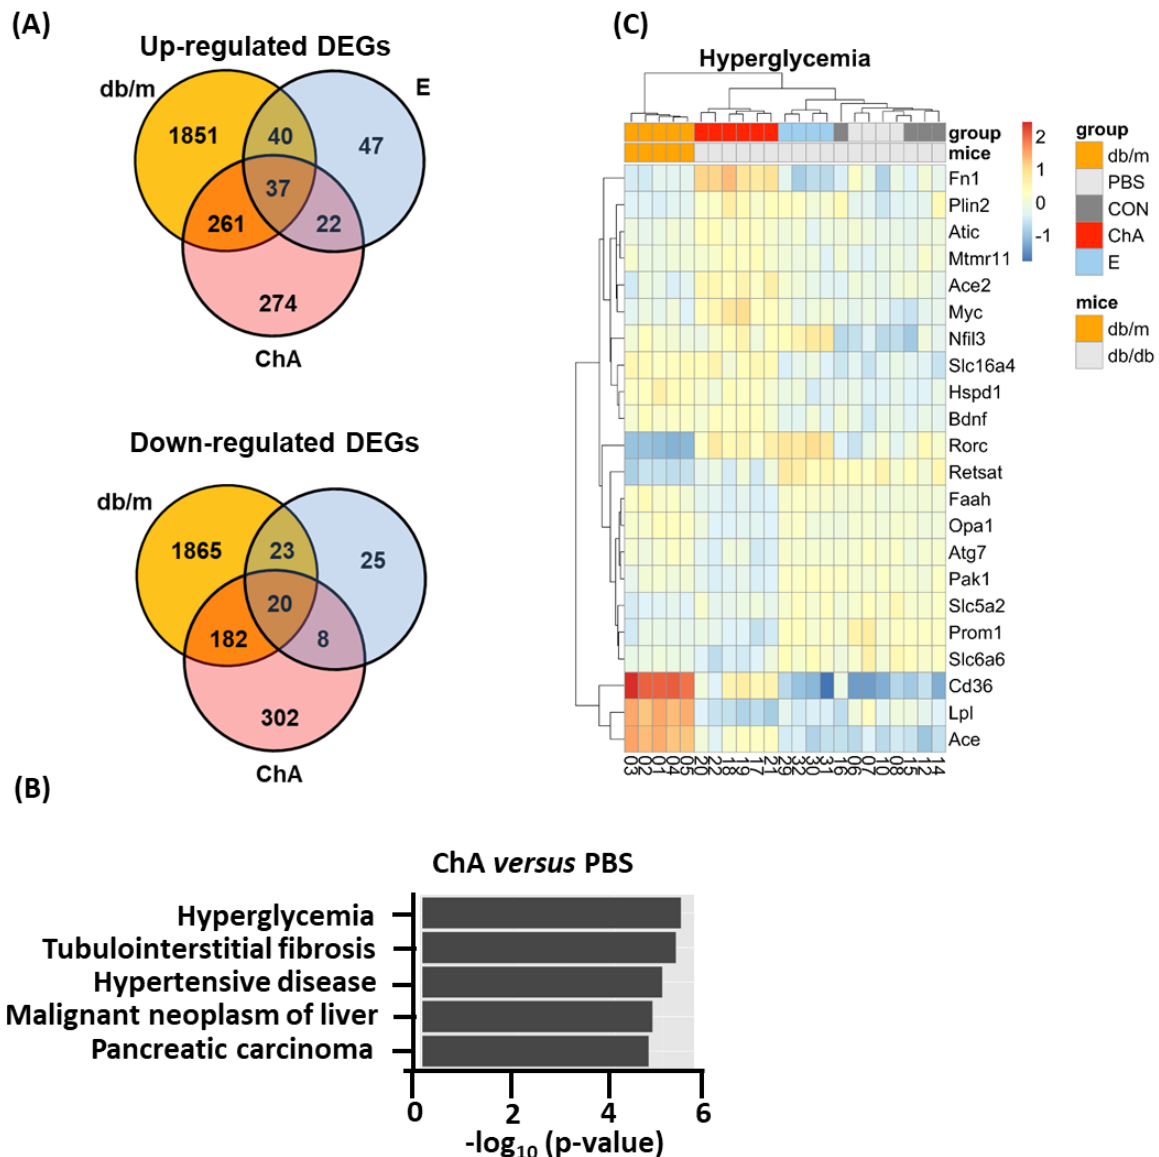

### Supplementary Figure 6. Inhibition of CHOP alters renal genes expression.

Venn diagram (A), enriched pathways (B) and hyperglycemia heat map (C, only gene with adjusted p value < 0.0005) summarizing differential gene expression identified by RNA-seq. Venn diagram (A) showing overlap of genes significantly changed (induction on top, repression on bottom) in intervention groups in relation to the expression pattern in db/db mice. Due to the low number of samples matching quality criteria, the CHOP-ASO+ACEi group has been excluded. Overrepresentation analysis based on “DisGeNet: BeFree gene-disease associations” of differentially expressed genes in ChA-treated db/db mice compared to PBS-injected db/db mice. The  $-\log_{10}$  of the p values (top 5) is shown (B). In the heat map, gene count values larger than the average are represented in yellow to red, while counts lower than the average are represented in blue. Transcript values close to the average value are indicated by white (C).

Nondiabetic healthy mice (db/m, 22 weeks old) and 22-week-old diabetic db/db mice treated for 6 weeks (starting at the age of 16 weeks) with PBS (PBS), nonspecific control oligonucleotide (CON), CHOP-ASO (ChA), or the ACE inhibitor enalapril (ACEi, E).

## Supplementary Figure 7

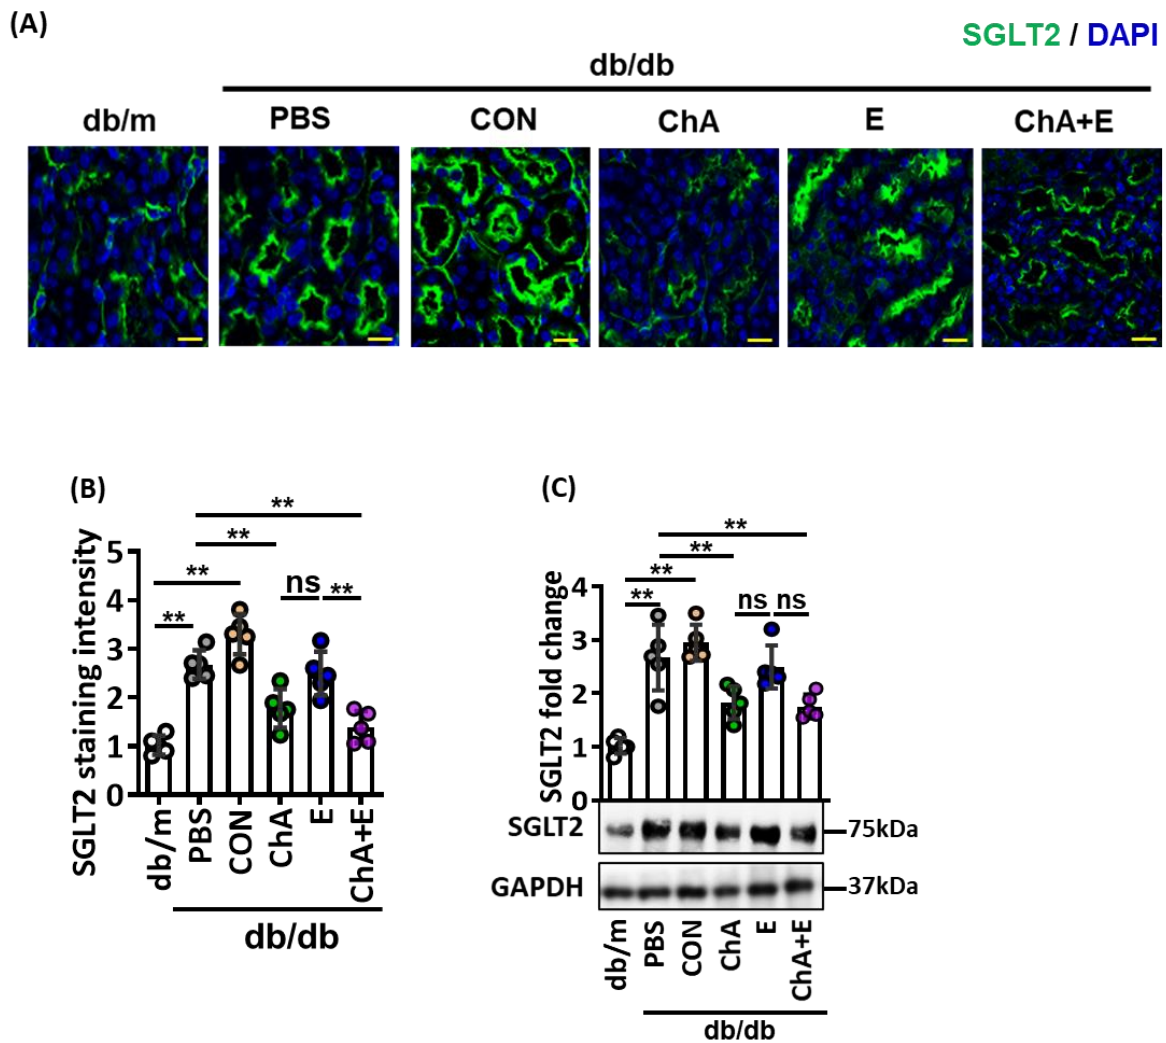

### Supplementary Figure 7.

Representative immunofluorescence of renal SGLT2 expression (A). SGLT2-positive cells are indicated by green fluorescence; nuclei were counterstained with DAPI (blue), scale bar = 20  $\mu$ m. Scatter plot with bars summarizing the relative staining intensity for SGLT2 (B). Representative immunoblots of renal SGLT2 expression (C, botto, GAPDH used as loading control) and scatter plot with bars summarizing immunoblot data (C, top).

Nondiabetic mice (db/m, 22 weeks old) and 22-week-old diabetic db/db mice treated for 6 weeks (starting at the age of 16 weeks) with PBS (PBS), nonspecific control oligonucleotide (CON), CHOP-ASO (ChA), the ACE inhibitor enalapril (ACEi, E) or a combination of CHOP-ASO plus enalapril (ChA+E).

\*\* $P < 0.01$ , ns, nonsignificant (ANOVA); each dot in scatter plots represents one mouse (B, C).

## Supplementary Figure 8

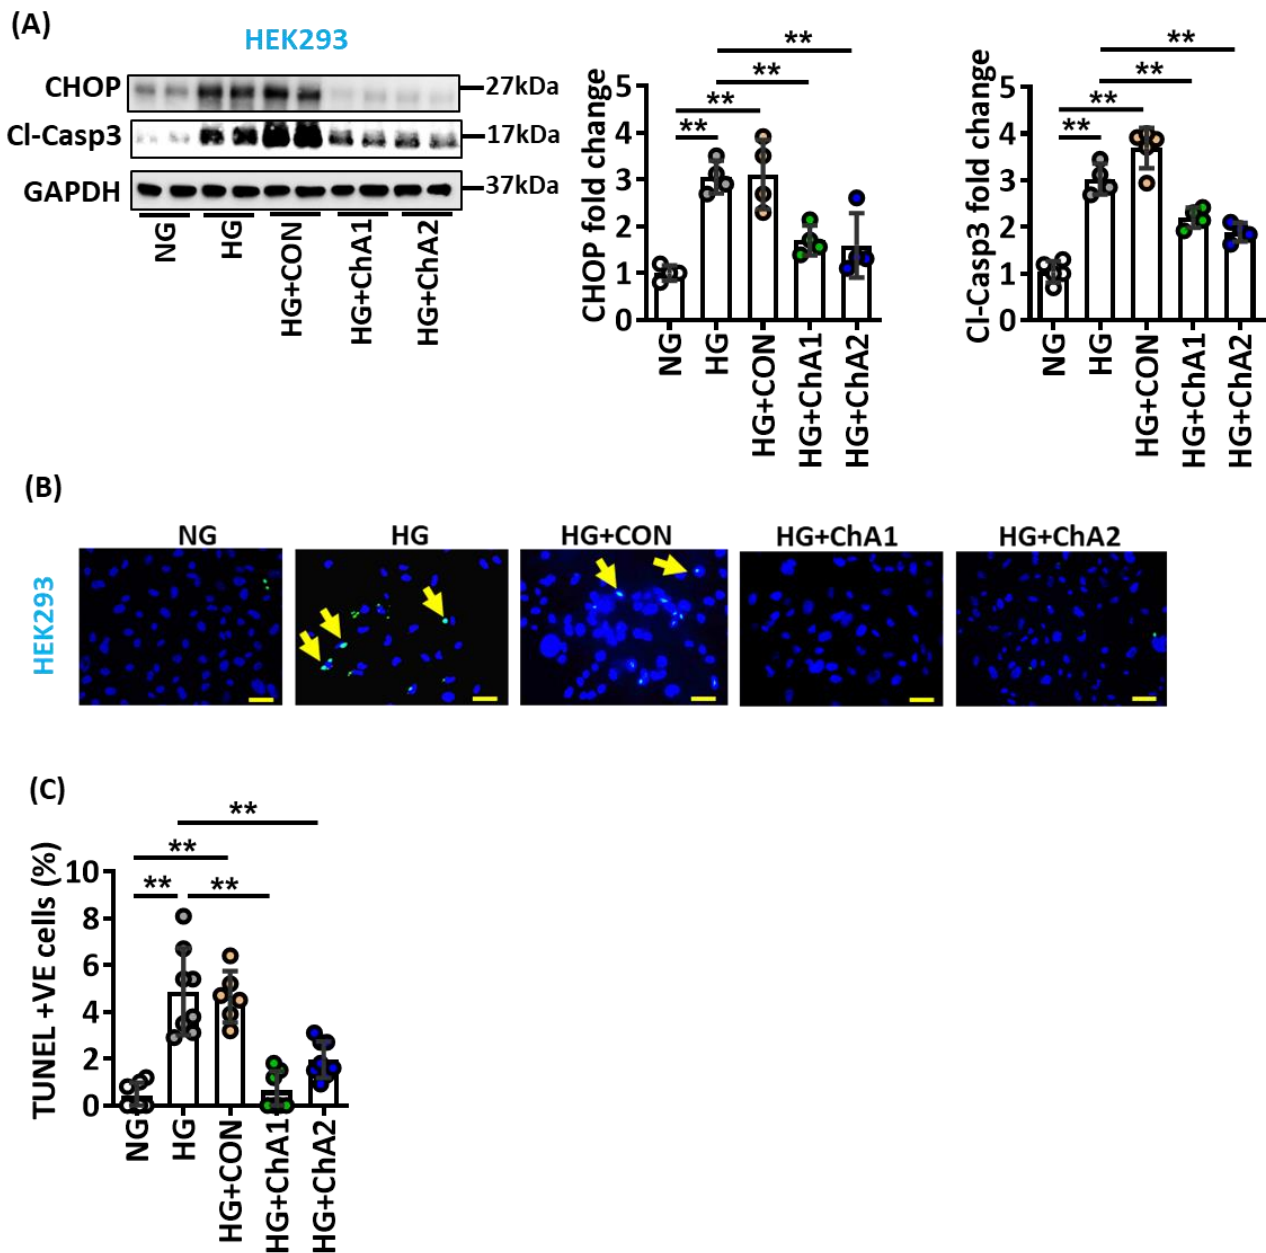

### Supplementary Figure 8 (corresponding to Figure 6).

**A:** Representative immunoblots of CHOP and cleaved caspase-3 expression in human embryonic kidney 293 cells (**left panel**) and scatter plot with bars summarizing the CHOP (**middle panel**) and cleaved caspase-3 immunoblot data (**right panel**). Three independent repeat experiments with two technical replicates each. GAPDH was used for normalization for both cell types

**B, C:** Representative immunofluorescence images of TUNEL staining of human embryonic kidney cells. TUNEL-positive cells are indicated by green fluorescence, and nuclei were counterstained with DAPI (blue). Scatter plot with bars summarizing the frequency of TUNEL-positive cells (**C**). Each dot in the scatter plot with bars represents averaged data from 6 different visual fields of independent experiments (biological replicates).

Control: NG: normal glucose (5 mM glucose plus 20 mM mannitol); HG+CON: (25 mM glucose+ 10  $\mu$ M nonspecific control oligonucleotide); HG: high glucose (25 mM); HG+ChA1: (25 mM glucose+ 10  $\mu$ M



CHOP-ASO1; HG+ChA2: (25 mM glucose+ 10  $\mu$ M CHOP-ASO2. Scale bar, 20  $\mu$ m (B); \*\* $P$ <0.01, (A, C: ANOVA). Each dot in scatter plots represents one sample.

## Supplementary Figure 9

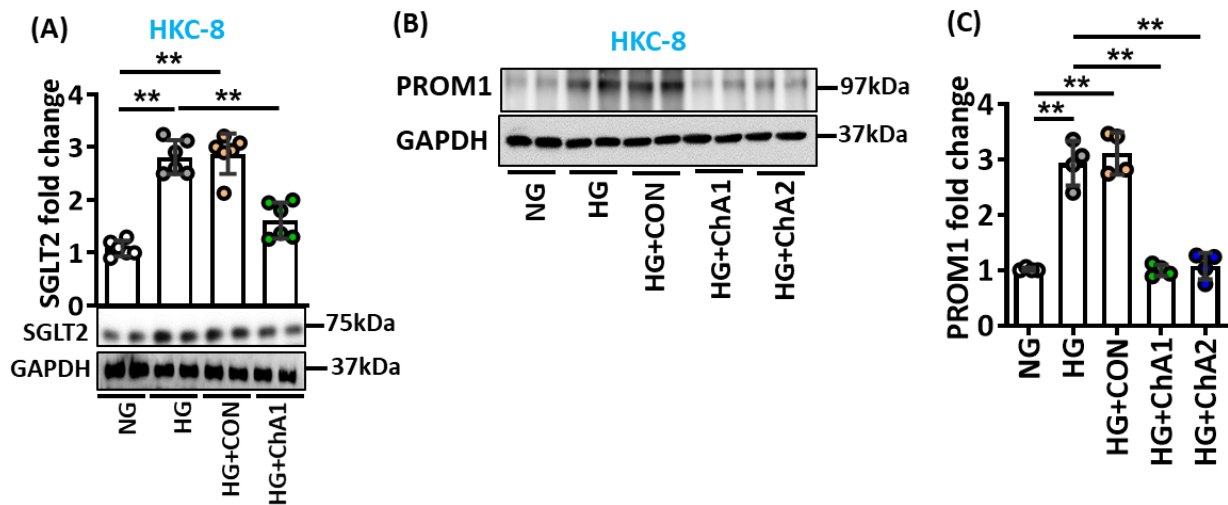

### Supplementary Figure 9 (corresponding to Figure 6).

Representative immunoblot images of SGLT2 (A, bottom, GAPDH was used for normalization) and scatter plot with bars summarizing the SGLT2 immunoblot data (A, top). Representative immunoblot images of PROM1 (CD133) expression in HKC-8 cells (B, GAPDH was used for normalization) and scatter plot with bars summarizing the PROM1 immunoblot data (C).

Control: NG: normal glucose (5 mM glucose plus 20 mM mannitol); HG+CON: (25 mM glucose+ 10  $\mu$ M nonspecific control oligonucleotide); HG: high glucose (25 mM); HG+ChA1: (25 mM glucose+ 10  $\mu$ M CHOP-ASO1); HG+ChA2: (25 mM glucose+ 10  $\mu$ M CHOP-ASO2. \*\* $P$ <0.01, (A, C: ANOVA); each dot in scatter plots represents one sample.

## Supplementary Table 1

| treatment | gene set        | pval            | padj         | overlap    | size        | disease                                                       |
|-----------|-----------------|-----------------|--------------|------------|-------------|---------------------------------------------------------------|
| ChA       | <b>C0020456</b> | <b>4.19E-06</b> | <b>0.013</b> | <b>91</b>  | <b>781</b>  | <b>Hyperglycemia</b>                                          |
| ChA       | <b>C1969372</b> | <b>5.38E-06</b> | <b>0.013</b> | <b>37</b>  | <b>233</b>  | <b>Tubulointerstitial fibrosis</b>                            |
| ChA       | <b>C0020538</b> | <b>1.03E-05</b> | <b>0.017</b> | <b>144</b> | <b>1405</b> | <b>Hypertensive disease</b>                                   |
| ChA       | <b>C0345904</b> | <b>1.63E-05</b> | <b>0.019</b> | <b>116</b> | <b>1091</b> | <b>Malignant neoplasm of liver</b>                            |
| ChA       | <b>C0235974</b> | <b>1.97E-05</b> | <b>0.019</b> | <b>183</b> | <b>1891</b> | <b>Pancreatic carcinoma</b>                                   |
| ChA       | <b>C0279000</b> | <b>2.36E-05</b> | <b>0.019</b> | <b>108</b> | <b>1008</b> | <b>Liver and Intrahepatic Biliary Tract Carcinoma</b>         |
| ChA       | <b>C0596263</b> | <b>3.34E-05</b> | <b>0.023</b> | <b>374</b> | <b>4335</b> | <b>Carcinogenesis</b>                                         |
| ChA       | <b>C0346647</b> | <b>5.54E-05</b> | <b>0.029</b> | <b>179</b> | <b>1876</b> | <b>Malignant neoplasm of pancreas</b>                         |
| ChA       | <b>C0037317</b> | <b>6.07E-05</b> | <b>0.029</b> | <b>18</b>  | <b>89</b>   | <b>Sleep disturbances</b>                                     |
| ChA       | <b>C0220630</b> | <b>6.46E-05</b> | <b>0.029</b> | <b>105</b> | <b>998</b>  | <b>Adult Liver Carcinoma</b>                                  |
| ChA       | <b>C0011849</b> | <b>6.66E-05</b> | <b>0.029</b> | <b>178</b> | <b>1870</b> | <b>Diabetes Mellitus</b>                                      |
| ChA       | <b>C1833662</b> | <b>1.07E-04</b> | <b>0.043</b> | <b>9</b>   | <b>28</b>   | <b>Inclusion body myopathy with early-onset Paget disease</b> |
| ChA       | <b>C0006142</b> | <b>1.16E-04</b> | <b>0.043</b> | <b>383</b> | <b>4513</b> | <b>Malignant neoplasm of breast</b>                           |
| ChA       | <b>C0018799</b> | <b>1.23E-04</b> | <b>0.043</b> | <b>45</b>  | <b>349</b>  | <b>Heart Diseases</b>                                         |
| ChA       | <b>C0007103</b> | <b>1.32E-04</b> | <b>0.043</b> | <b>92</b>  | <b>866</b>  | <b>Malignant neoplasm of endometrium</b>                      |
| ChA       | <b>C0678222</b> | <b>1.59E-04</b> | <b>0.048</b> | <b>383</b> | <b>4529</b> | <b>Breast Carcinoma</b>                                       |
| ChA       | C0278996        | 1.88E-04        | 0.052        | 63         | 548         | Malignant Head and Neck Neoplasm                              |
| ChA       | C0023895        | 1.97E-04        | 0.052        | 74         | 671         | Liver diseases                                                |
| ChA       | C0004096        | 2.11E-04        | 0.052        | 114        | 1135        | Asthma                                                        |
| ChA       | C0011847        | 2.15E-04        | 0.052        | 156        | 1641        | Diabetes                                                      |
| E         | <b>C3714524</b> | <b>3.28E-06</b> | <b>0.016</b> | <b>6</b>   | <b>29</b>   | <b>Fibromyxosarcoma</b>                                       |
| E         | C0268238        | 4.78E-05        | 0.072        | 5          | 28          | Triglyceride storage disease with ichthyosis                  |
| E         | C0004997        | 5.26E-05        | 0.072        | 6          | 46          | Benign Ovarian Neoplasm                                       |
| E         | C0004153        | 7.23E-05        | 0.072        | 39         | 1410        | Atherosclerosis                                               |
| E         | C0003850        | 7.45E-05        | 0.072        | 39         | 1412        | Arteriosclerosis                                              |
| E         | C0006142        | 1.13E-04        | 0.089        | 92         | 4513        | Malignant neoplasm of breast                                  |
| E         | C0019196        | 1.64E-04        | 0.089        | 34         | 1209        | Hepatitis C                                                   |
| E         | C0027051        | 1.65E-04        | 0.089        | 32         | 1109        | Myocardial Infarction                                         |
| E         | C0400966        | 1.77E-04        | 0.089        | 24         | 730         | Non-alcoholic Fatty Liver Disease                             |
| E         | C0740457        | 1.84E-04        | 0.089        | 18         | 468         | Malignant neoplasm of kidney                                  |
| E         | C1969443        | 2.19E-04        | 0.096        | 4          | 21          | Trifunctional Protein Deficiency With Myopathy And Neuropathy |
| E         | C1378703        | 2.38E-04        | 0.096        | 18         | 478         | Renal carcinoma                                               |
| E         | C0279671        | 2.77E-04        | 0.101        | 13         | 283         | Cervical Squamous Cell Carcinoma                              |
| E         | C0279545        | 3.17E-04        | 0.101        | 4          | 23          | Adult Epithelioid Sarcoma                                     |
| E         | C0279989        | 3.17E-04        | 0.101        | 4          | 23          | Childhood Epithelioid Sarcoma                                 |
| E         | C0596263        | 3.61E-04        | 0.101        | 87         | 4335        | Carcinogenesis                                                |
| E         | C0015695        | 3.64E-04        | 0.101        | 20         | 583         | Fatty Liver                                                   |
| E         | C0678222        | 3.76E-04        | 0.101        | 90         | 4529        | Breast Carcinoma                                              |
| E         | C4049328        | 4.67E-04        | 0.102        | 3          | 11          | Renal medullary carcinoma                                     |
| E         | C3887523        | 4.67E-04        | 0.102        | 3          | 11          | Very long chain acyl-CoA dehydrogenase deficiency             |

**Supplementary Table 1:** Results from overrepresentation analysis (ORA) were collected. The 20 gene set showing the lowest p-values were presented for each treatment indicated in the first column. Each row corresponds to a tested gene set. The columns two to six are the following: **gene set:** name of the gene set; **pval:** an enrichment p-value from hypergeometric test; **padj:** Benjamini-Hochberg (BH) adjusted p-value; **overlap:** number of significantly differentially expressed genes present in the gene set; **size:** size of the gene set; **disease:** disease corresponding to the gene set. For each treatment the gene set are sorted by their p-value. Gene sets showing an adjusted p-value <0.05 are depicted in bold.

## Supplementary Table 2

| GeneSymbol    | baseMean        | log2FoldChange | lfcSE       | stat         | pvalue          | padj            |
|---------------|-----------------|----------------|-------------|--------------|-----------------|-----------------|
| <b>A1cf</b>   | <b>2856.01</b>  | <b>0.34</b>    | <b>0.09</b> | <b>3.92</b>  | <b>8.96E-05</b> | <b>3.62E-03</b> |
| Abca1         | 1928.28         | -0.08          | 0.17        | -0.50        | 0.616           | 0.861           |
| Abca4         | 373.03          | -0.11          | 0.21        | -0.52        | 0.602           | 0.855           |
| <b>Abcc1</b>  | <b>931.15</b>   | <b>-0.33</b>   | <b>0.11</b> | <b>-3.04</b> | <b>2.40E-03</b> | <b>0.039</b>    |
| Abcc4         | 3694.04         | -0.34          | 0.15        | -2.34        | 0.019           | 0.152           |
| Abcg2         | 10803.90        | 0.14           | 0.08        | 1.67         | 0.095           | 0.372           |
| Acaca         | 1210.76         | -0.62          | 0.22        | -2.86        | 4.28E-03        | 0.059           |
| Acat1         | 18330.48        | 0.21           | 0.09        | 2.31         | 0.021           | 0.158           |
| <b>Ace</b>    | <b>5226.15</b>  | <b>0.74</b>    | <b>0.12</b> | <b>5.97</b>  | <b>2.35E-09</b> | <b>7.28E-07</b> |
| <b>Ace2</b>   | <b>2353.46</b>  | <b>0.64</b>    | <b>0.11</b> | <b>5.69</b>  | <b>1.26E-08</b> | <b>3.22E-06</b> |
| Ache          | 171.26          | 0.61           | 0.26        | 2.38         | 0.017           | 0.142           |
| Ackr3         | 1099.62         | 0.04           | 0.11        | 0.41         | 0.685           | 0.894           |
| <b>Acsm3</b>  | <b>6107.14</b>  | <b>1.12</b>    | <b>0.26</b> | <b>4.26</b>  | <b>2.07E-05</b> | <b>1.22E-03</b> |
| Actb          | 41198.27        | -0.08          | 0.08        | -1.06        | 0.289           | 0.641           |
| Acvr1         | 428.45          | 0.11           | 0.16        | 0.68         | 0.494           | 0.794           |
| Adcy5         | 161.03          | -0.36          | 0.23        | -1.58        | 0.114           | 0.409           |
| Adipoq        | 39.61           | -1.02          | 1.79        | -0.57        | 0.568           | 0.837           |
| Adipor1       | 4888.47         | -0.06          | 0.08        | -0.68        | 0.497           | 0.795           |
| Adipor2       | 3023.62         | 0.01           | 0.07        | 0.19         | 0.846           | 0.952           |
| Adk           | 5792.46         | -0.08          | 0.08        | -1.08        | 0.281           | 0.633           |
| Adm           | 310.27          | 0.54           | 0.21        | 2.50         | 0.012           | 0.115           |
| Adora2b       | 96.21           | 0.33           | 0.23        | 1.43         | 0.154           | 0.477           |
| Adra1a        | 1134.47         | -0.05          | 0.12        | -0.41        | 0.682           | 0.893           |
| Adra2b        | 7260.88         | 0.03           | 0.14        | 0.25         | 0.803           | 0.941           |
| Ager          | 15.18           | -0.13          | 0.42        | -0.31        | 0.757           | 0.924           |
| Agfg1         | 1795.95         | 0.08           | 0.08        | 0.98         | 0.327           | 0.675           |
| Aggf1         | 1170.39         | 0.17           | 0.10        | 1.77         | 0.078           | 0.338           |
| Agt           | 2320.24         | -0.13          | 0.15        | -0.92        | 0.358           | 0.701           |
| Ahr           | 298.09          | 0.06           | 0.15        | 0.39         | 0.694           | 0.896           |
| <b>Ahsa1</b>  | <b>2675.70</b>  | <b>0.34</b>    | <b>0.09</b> | <b>3.69</b>  | <b>2.23E-04</b> | <b>7.21E-03</b> |
| Ahsg          | 11.64           | -0.24          | 1.25        | -0.19        | 0.847           | 0.952           |
| Aif1          | 38.21           | 0.06           | 0.56        | 0.10         | 0.922           | 0.978           |
| Aimp2         | 453.52          | 0.33           | 0.13        | 2.45         | 0.014           | 0.125           |
| Akt1          | 3843.87         | -0.04          | 0.08        | -0.55        | 0.583           | 0.845           |
| Akt2          | 3448.84         | -0.04          | 0.07        | -0.58        | 0.565           | 0.835           |
| Alad          | 3027.93         | -0.14          | 0.08        | -1.75        | 0.081           | 0.344           |
| Alb           | 589.68          | 0.56           | 0.58        | 0.96         | 0.335           | 0.681           |
| <b>Aldh2</b>  | <b>19980.75</b> | <b>0.19</b>    | <b>0.06</b> | <b>2.93</b>  | <b>3.35E-03</b> | <b>0.049</b>    |
| Aldob         | 241830.55       | 0.19           | 0.08        | 2.48         | 0.013           | 0.119           |
| Alk           | 12.02           | 0.31           | 0.69        | 0.45         | 0.656           | 0.880           |
| Alox15        | 732.49          | 0.39           | 0.33        | 1.17         | 0.240           | 0.593           |
| <b>Angpt1</b> | <b>458.35</b>   | <b>-0.47</b>   | <b>0.16</b> | <b>-2.98</b> | <b>2.88E-03</b> | <b>0.044</b>    |

|                |                |              |             |              |                 |                 |
|----------------|----------------|--------------|-------------|--------------|-----------------|-----------------|
| Angpt2         | 226.04         | -0.50        | 0.22        | -2.30        | 0.021           | 0.160           |
| Angptl2        | 881.38         | -0.04        | 0.15        | -0.29        | 0.774           | 0.929           |
| <b>Angptl8</b> | <b>45.78</b>   | <b>1.01</b>  | <b>0.34</b> | <b>2.96</b>  | <b>3.10E-03</b> | <b>0.046</b>    |
| <b>Anpep</b>   | <b>4639.77</b> | <b>0.38</b>  | <b>0.09</b> | <b>4.03</b>  | <b>5.59E-05</b> | <b>2.53E-03</b> |
| Anxa5          | 2407.19        | 0.05         | 0.08        | 0.55         | 0.585           | 0.846           |
| Aoc3           | 50.86          | 0.19         | 0.56        | 0.35         | 0.730           | 0.912           |
| Apoa1          | 27.47          | 0.12         | 0.44        | 0.27         | 0.784           | 0.933           |
| Apoa4          | 478.14         | 0.11         | 0.17        | 0.62         | 0.535           | 0.817           |
| Apob           | 23625.19       | -0.07        | 0.16        | -0.44        | 0.657           | 0.881           |
| Apoc3          | 331.33         | -0.15        | 0.26        | -0.59        | 0.557           | 0.831           |
| <b>Apoe</b>    | <b>6112.25</b> | <b>-0.69</b> | <b>0.22</b> | <b>-3.16</b> | <b>1.56E-03</b> | <b>0.030</b>    |
| Apom           | 1283.85        | 0.06         | 0.18        | 0.35         | 0.724           | 0.909           |
| App            | 36238.10       | 0.02         | 0.09        | 0.28         | 0.780           | 0.931           |
| Appl1          | 865.63         | -0.10        | 0.20        | -0.53        | 0.598           | 0.852           |
| Aprt           | 2143.85        | 0.04         | 0.11        | 0.39         | 0.695           | 0.897           |
| Aqp3           | 2406.99        | -0.14        | 0.14        | -0.99        | 0.323           | 0.671           |
| Aqp7           | 637.40         | -0.23        | 0.11        | -2.16        | 0.031           | 0.200           |
| Ar             | 3287.10        | 0.03         | 0.12        | 0.26         | 0.791           | 0.935           |
| Arf6           | 1766.01        | -0.10        | 0.06        | -1.67        | 0.094           | 0.372           |
| Arg1           | 26.58          | 2.17         | 0.89        | 2.43         | 0.015           | 0.129           |
| Arhgef7        | 2660.19        | -0.02        | 0.11        | -0.22        | 0.829           | 0.947           |
| Arrb1          | 1756.42        | 0.01         | 0.10        | 0.09         | 0.932           | 0.980           |
| Arrb2          | 258.56         | -0.23        | 0.24        | -0.95        | 0.341           | 0.686           |
| Arsa           | 393.89         | -0.39        | 0.14        | -2.69        | 7.21E-03        | 0.082           |
| Asah1          | 2101.31        | -0.01        | 0.13        | -0.11        | 0.912           | 0.975           |
| Ascc1          | 1458.27        | -0.07        | 0.12        | -0.58        | 0.565           | 0.835           |
| Aspg           | 862.77         | -0.13        | 0.24        | -0.55        | 0.582           | 0.845           |
| Asrgl1         | 468.81         | 0.01         | 0.16        | 0.04         | 0.971           | 0.992           |
| Atf3           | 86.65          | 1.39         | 0.64        | 2.17         | 0.030           | 0.197           |
| Atg4b          | 1502.84        | 0.09         | 0.14        | 0.67         | 0.505           | 0.801           |
| Atg5           | 1337.83        | 0.14         | 0.10        | 1.41         | 0.159           | 0.484           |
| <b>Atg7</b>    | <b>785.49</b>  | <b>-0.54</b> | <b>0.11</b> | <b>-5.04</b> | <b>4.58E-07</b> | <b>5.94E-05</b> |
| <b>Atic</b>    | <b>866.01</b>  | <b>0.46</b>  | <b>0.09</b> | <b>5.01</b>  | <b>5.41E-07</b> | <b>6.62E-05</b> |
| Atm            | 1055.22        | -0.03        | 0.13        | -0.21        | 0.833           | 0.949           |
| Atn1           | 1840.01        | 0.26         | 0.15        | 1.77         | 0.077           | 0.337           |
| Atp2a3         | 613.45         | 0.18         | 0.16        | 1.08         | 0.280           | 0.633           |
| Bax            | 874.20         | 0.02         | 0.12        | 0.19         | 0.846           | 0.952           |
| Bche           | 11.00          | 2.15         | 0.94        | 2.29         | 0.022           | 0.162           |
| Bcl2           | 522.90         | -0.26        | 0.11        | -2.28        | 0.022           | 0.164           |
| <b>Bdnf</b>    | <b>163.99</b>  | <b>0.88</b>  | <b>0.19</b> | <b>4.60</b>  | <b>4.24E-06</b> | <b>3.63E-04</b> |
| Becn1          | 3508.68        | -0.01        | 0.13        | -0.05        | 0.957           | 0.988           |
| Best1          | 11.60          | 0.29         | 0.64        | 0.46         | 0.646           | 0.876           |
| Bhlhe22        | 12.82          | -0.14        | 0.47        | -0.29        | 0.772           | 0.929           |
| Bmp4           | 856.35         | 0.31         | 0.14        | 2.18         | 0.029           | 0.194           |
| Bmp7           | 1322.88        | -0.18        | 0.09        | -2.06        | 0.039           | 0.230           |

|              |                 |              |             |              |                 |                 |
|--------------|-----------------|--------------|-------------|--------------|-----------------|-----------------|
| Bms1         | 904.33          | 0.15         | 0.13        | 1.20         | 0.230           | 0.580           |
| Bnip3        | 6529.58         | -0.04        | 0.11        | -0.39        | 0.699           | 0.899           |
| Brd2         | 5509.18         | 0.20         | 0.09        | 2.25         | 0.024           | 0.173           |
| Brd7         | 1134.51         | 0.24         | 0.16        | 1.45         | 0.146           | 0.465           |
| Brd9         | 422.17          | 0.01         | 0.12        | 0.11         | 0.911           | 0.974           |
| Btc          | 342.28          | 0.04         | 0.18        | 0.19         | 0.846           | 0.952           |
| C5ar1        | 26.81           | 0.20         | 0.80        | 0.25         | 0.804           | 0.941           |
| Cacna1d      | 175.33          | -0.20        | 0.28        | -0.70        | 0.485           | 0.789           |
| Cadm2        | 17.24           | -0.51        | 0.65        | -0.78        | 0.433           | 0.754           |
| Capn1        | 1224.82         | 0.08         | 0.10        | 0.85         | 0.395           | 0.729           |
| Casp1        | 29.86           | -0.38        | 0.38        | -1.01        | 0.315           | 0.665           |
| Casp3        | 689.73          | -0.07        | 0.10        | -0.74        | 0.457           | 0.772           |
| Casp8        | 998.21          | 0.32         | 0.13        | 2.42         | 0.016           | 0.133           |
| Casr         | 1943.55         | -0.45        | 0.16        | -2.75        | 6.02E-03        | 0.072           |
| Casz1        | 865.96          | 0.01         | 0.17        | 0.04         | 0.967           | 0.991           |
| Cat          | 22812.41        | 0.09         | 0.09        | 0.99         | 0.324           | 0.671           |
| Cav1         | 909.53          | 0.21         | 0.19        | 1.10         | 0.272           | 0.624           |
| Ccl2         | 17.66           | -0.02        | 0.53        | -0.05        | 0.964           | 0.991           |
| Ccl5         | 18.06           | 1.02         | 0.68        | 1.49         | 0.135           | 0.447           |
| <b>Ccn1</b>  | <b>1137.41</b>  | <b>1.86</b>  | <b>0.52</b> | <b>3.55</b>  | <b>3.88E-04</b> | <b>0.011</b>    |
| Ccn2         | 2353.01         | -0.17        | 0.31        | -0.56        | 0.578           | 0.844           |
| Ccn3         | 8.88            | 0.37         | 0.75        | 0.49         | 0.626           | 0.865           |
| <b>Ccnd1</b> | <b>11112.84</b> | <b>-0.73</b> | <b>0.19</b> | <b>-3.97</b> | <b>7.26E-05</b> | <b>3.08E-03</b> |
| Ccr2         | 133.15          | 0.52         | 0.41        | 1.28         | 0.199           | 0.540           |
| <b>Cct2</b>  | <b>4678.48</b>  | <b>0.21</b>  | <b>0.05</b> | <b>3.86</b>  | <b>1.13E-04</b> | <b>4.27E-03</b> |
| Cd226        | 27.16           | -0.39        | 0.73        | -0.53        | 0.597           | 0.851           |
| Cd33         | 44.32           | -0.43        | 0.54        | -0.79        | 0.427           | 0.751           |
| <b>Cd36</b>  | <b>4676.84</b>  | <b>1.69</b>  | <b>0.26</b> | <b>6.48</b>  | <b>9.26E-11</b> | <b>4.52E-08</b> |
| Cd40         | 44.72           | 0.61         | 0.43        | 1.43         | 0.152           | 0.475           |
| Cd44         | 89.86           | 0.16         | 0.50        | 0.31         | 0.754           | 0.922           |
| Cd68         | 44.35           | 0.14         | 0.38        | 0.38         | 0.705           | 0.902           |
| Cd86         | 38.95           | 0.35         | 0.55        | 0.64         | 0.524           | 0.812           |
| Cdc25c       | 7.20            | 0.59         | 1.16        | 0.51         | 0.613           | NA              |
| Cdc42        | 8149.52         | -0.08        | 0.08        | -0.92        | 0.359           | 0.701           |
| Cdh5         | 561.17          | 0.35         | 0.19        | 1.90         | 0.058           | 0.288           |
| Cdk2         | 353.50          | -0.03        | 0.13        | -0.22        | 0.825           | 0.945           |
| Cdk4         | 2022.41         | -0.02        | 0.13        | -0.15        | 0.880           | 0.963           |
| Cdk5         | 842.23          | -0.11        | 0.13        | -0.87        | 0.384           | 0.722           |
| Cdkn1a       | 698.91          | 0.75         | 0.33        | 2.26         | 0.024           | 0.171           |
| Cebpa        | 1249.00         | 0.22         | 0.14        | 1.51         | 0.131           | 0.439           |
| Cenpx        | 1163.23         | -0.01        | 0.14        | -0.08        | 0.933           | 0.980           |
| Cers2        | 4490.20         | -0.05        | 0.08        | -0.59        | 0.554           | 0.829           |
| Chmp2b       | 2017.00         | 0.20         | 0.08        | 2.51         | 0.012           | 0.114           |
| Chpt1        | 36788.00        | 0.22         | 0.13        | 1.68         | 0.093           | 0.368           |
| Chrm3        | 71.67           | -0.29        | 0.31        | -0.92        | 0.356           | 0.698           |

|               |                 |              |             |              |                 |                 |
|---------------|-----------------|--------------|-------------|--------------|-----------------|-----------------|
| Clip1         | 2651.65         | 0.09         | 0.11        | 0.85         | 0.395           | 0.729           |
| Clip2         | 1602.25         | -0.10        | 0.09        | -1.17        | 0.241           | 0.593           |
| Cmklr1        | 98.07           | 0.23         | 0.27        | 0.87         | 0.382           | 0.721           |
| Cnbp          | 6795.78         | -0.13        | 0.10        | -1.32        | 0.186           | 0.523           |
| Cndp1         | 1353.52         | 0.24         | 0.17        | 1.38         | 0.169           | 0.499           |
| Cnr1          | 8.69            | 0.35         | 0.98        | 0.36         | 0.718           | 0.907           |
| Comp          | 10.39           | 0.20         | 0.66        | 0.29         | 0.769           | 0.928           |
| Copa          | 11774.69        | -0.04        | 0.08        | -0.48        | 0.629           | 0.867           |
| Coro7         | 1221.60         | -0.18        | 0.16        | -1.10        | 0.273           | 0.625           |
| Cox4i1        | 18936.51        | -0.07        | 0.10        | -0.69        | 0.487           | 0.790           |
| Cox4i2        | 7.00            | -0.48        | 0.62        | -0.78        | 0.435           | NA              |
| Cpt1a         | 17978.32        | 0.00         | 0.12        | -0.04        | 0.968           | 0.991           |
| <b>Cpt2</b>   | <b>4867.36</b>  | <b>0.46</b>  | <b>0.11</b> | <b>4.04</b>  | <b>5.37E-05</b> | <b>2.47E-03</b> |
| Creb1         | 1215.64         | 0.28         | 0.12        | 2.37         | 0.018           | 0.144           |
| Crebbp        | 3611.45         | 0.09         | 0.17        | 0.53         | 0.594           | 0.850           |
| Crem          | 480.79          | 0.05         | 0.19        | 0.26         | 0.798           | 0.938           |
| Crk           | 5346.71         | -0.05        | 0.07        | -0.65        | 0.516           | 0.808           |
| Crtc2         | 912.09          | -0.17        | 0.13        | -1.32        | 0.187           | 0.523           |
| Cry1          | 602.24          | 0.60         | 0.22        | 2.78         | 5.43E-03        | 0.068           |
| Cryz          | 17680.02        | 0.05         | 0.08        | 0.66         | 0.507           | 0.802           |
| Csf1          | 211.43          | 0.52         | 0.22        | 2.36         | 0.018           | 0.147           |
| Csf1r         | 1139.17         | -0.30        | 0.19        | -1.52        | 0.127           | 0.434           |
| <b>Ctdsp1</b> | <b>4234.47</b>  | <b>-0.15</b> | <b>0.05</b> | <b>-3.05</b> | <b>2.32E-03</b> | <b>0.039</b>    |
| Ctdsp2        | 5433.66         | -0.18        | 0.11        | -1.64        | 0.100           | 0.383           |
| Ctnnb1        | 12388.18        | 0.04         | 0.07        | 0.52         | 0.604           | 0.856           |
| Ctsa          | 11835.42        | 0.01         | 0.09        | 0.13         | 0.896           | 0.970           |
| Cux1          | 8858.37         | 0.14         | 0.09        | 1.62         | 0.105           | 0.392           |
| Cx3cl1        | 1233.76         | 0.06         | 0.12        | 0.48         | 0.634           | 0.869           |
| Cxcl10        | 212.03          | 0.02         | 0.29        | 0.07         | 0.946           | 0.985           |
| Cxcl12        | 2613.12         | 0.45         | 0.16        | 2.78         | 5.46E-03        | 0.068           |
| Cxcr3         | 10.27           | -0.36        | 0.69        | -0.51        | 0.607           | 0.857           |
| Cxcr4         | 108.79          | 0.06         | 0.29        | 0.23         | 0.821           | 0.944           |
| Cxcr6         | 27.70           | 0.16         | 0.70        | 0.23         | 0.819           | 0.944           |
| Cyba          | 6798.58         | -0.12        | 0.14        | -0.82        | 0.410           | 0.739           |
| Cybb          | 269.64          | 0.05         | 0.41        | 0.12         | 0.908           | 0.974           |
| Cyc1          | 11769.14        | -0.02        | 0.12        | -0.15        | 0.878           | 0.963           |
| <b>Cyp1b1</b> | <b>813.93</b>   | <b>-0.52</b> | <b>0.17</b> | <b>-3.12</b> | <b>1.79E-03</b> | <b>0.033</b>    |
| <b>Cyp2e1</b> | <b>23810.62</b> | <b>0.66</b>  | <b>0.17</b> | <b>3.82</b>  | <b>1.35E-04</b> | <b>4.90E-03</b> |
| Dab2          | 13646.05        | -0.07        | 0.11        | -0.63        | 0.530           | 0.814           |
| Dact1         | 127.91          | -0.30        | 0.21        | -1.44        | 0.151           | 0.472           |
| Dapk2         | 281.00          | 0.22         | 0.18        | 1.23         | 0.220           | 0.569           |
| <b>Dbp</b>    | <b>1376.49</b>  | <b>-0.96</b> | <b>0.31</b> | <b>-3.08</b> | <b>2.10E-03</b> | <b>0.036</b>    |
| Dcaf1         | 1414.03         | 0.12         | 0.16        | 0.75         | 0.455           | 0.770           |
| <b>Dcn</b>    | <b>758.66</b>   | <b>0.77</b>  | <b>0.18</b> | <b>4.33</b>  | <b>1.47E-05</b> | <b>9.28E-04</b> |
| Ddah2         | 341.31          | -0.14        | 0.15        | -0.90        | 0.368           | 0.711           |

|              |                 |              |             |              |                 |                 |
|--------------|-----------------|--------------|-------------|--------------|-----------------|-----------------|
| Ddit3        | 234.49          | 0.04         | 0.22        | 0.18         | 0.854           | 0.954           |
| Ddit4        | 730.90          | 0.13         | 0.44        | 0.29         | 0.771           | 0.929           |
| <b>Ddr2</b>  | <b>292.13</b>   | <b>0.83</b>  | <b>0.24</b> | <b>3.47</b>  | <b>5.30E-04</b> | <b>0.013</b>    |
| <b>Deaf1</b> | <b>1077.74</b>  | <b>-0.26</b> | <b>0.08</b> | <b>-3.27</b> | <b>1.09E-03</b> | <b>0.023</b>    |
| <b>Decr1</b> | <b>6291.93</b>  | <b>0.39</b>  | <b>0.10</b> | <b>3.86</b>  | <b>1.13E-04</b> | <b>4.27E-03</b> |
| Degs1        | 4857.33         | -0.23        | 0.09        | -2.39        | 0.017           | 0.139           |
| Denr         | 691.98          | -0.15        | 0.18        | -0.81        | 0.417           | 0.743           |
| Desi1        | 808.31          | 0.17         | 0.13        | 1.28         | 0.201           | 0.542           |
| <b>Dgkd</b>  | <b>3619.67</b>  | <b>0.35</b>  | <b>0.12</b> | <b>3.00</b>  | <b>2.66E-03</b> | <b>0.042</b>    |
| Dld          | 8195.70         | 0.04         | 0.07        | 0.59         | 0.552           | 0.828           |
| Dlg1         | 2539.10         | -0.08        | 0.07        | -1.07        | 0.284           | 0.636           |
| Dmd          | 444.63          | 0.09         | 0.20        | 0.46         | 0.645           | 0.875           |
| Dnm1l        | 2528.83         | 0.04         | 0.09        | 0.38         | 0.701           | 0.900           |
| Dnmt1        | 951.02          | 0.15         | 0.14        | 1.07         | 0.283           | 0.636           |
| Doc2b        | 15.15           | 0.67         | 0.57        | 1.18         | 0.239           | 0.591           |
| Dpp4         | 3359.47         | 0.17         | 0.16        | 1.04         | 0.298           | 0.646           |
| Dusp1        | 1962.48         | 0.00         | 0.58        | 0.00         | 0.998           | 0.999           |
| Dusp26       | 10.96           | -0.88        | 0.66        | -1.32        | 0.185           | 0.521           |
| Dusp6        | 1670.92         | -0.02        | 0.19        | -0.10        | 0.918           | 0.977           |
| Dusp9        | 242.79          | -0.11        | 0.17        | -0.63        | 0.532           | 0.815           |
| Dync1h1      | 22915.21        | 0.06         | 0.17        | 0.34         | 0.732           | 0.913           |
| E2f1         | 108.00          | 0.62         | 0.26        | 2.39         | 0.017           | 0.139           |
| Ece1         | 1791.59         | -0.01        | 0.21        | -0.03        | 0.973           | 0.992           |
| Edn1         | 50.49           | -0.09        | 0.29        | -0.32        | 0.751           | 0.920           |
| Ednra        | 46.70           | 0.20         | 0.25        | 0.79         | 0.430           | 0.752           |
| Efhnd2       | 927.54          | 0.05         | 0.14        | 0.37         | 0.713           | 0.905           |
| Egf          | 59962.59        | -0.01        | 0.11        | -0.12        | 0.901           | 0.971           |
| Egfr         | 3535.43         | 0.02         | 0.10        | 0.22         | 0.826           | 0.946           |
| Egln3        | 611.43          | -0.18        | 0.12        | -1.48        | 0.140           | 0.455           |
| Egr1         | 558.73          | 2.67         | 0.99        | 2.70         | NA              | NA              |
| Ehmt1        | 1189.87         | 0.02         | 0.11        | 0.21         | 0.832           | 0.949           |
| Ehmt2        | 4235.80         | 0.06         | 0.08        | 0.76         | 0.446           | 0.764           |
| Elavl1       | 2239.79         | 0.18         | 0.08        | 2.22         | 0.026           | 0.182           |
| Elov1        | 1991.33         | 0.08         | 0.08        | 0.94         | 0.345           | 0.690           |
| Elov15       | 1845.28         | 0.08         | 0.10        | 0.76         | 0.445           | 0.764           |
| Emcn         | 967.37          | 0.11         | 0.16        | 0.72         | 0.475           | 0.783           |
| Enho         | 55.61           | 0.82         | 0.31        | 2.63         | 8.61E-03        | 0.091           |
| <b>Eno1</b>  | <b>42809.20</b> | <b>0.30</b>  | <b>0.07</b> | <b>4.18</b>  | <b>2.92E-05</b> | <b>1.57E-03</b> |
| Eno2         | 42.66           | -0.13        | 0.48        | -0.26        | 0.794           | 0.936           |
| Enpp1        | 1747.29         | -0.20        | 0.12        | -1.69        | 0.090           | 0.365           |
| Entpd1       | 343.80          | 0.28         | 0.21        | 1.29         | 0.199           | 0.540           |
| Ep300        | 3707.21         | -0.10        | 0.18        | -0.58        | 0.563           | 0.834           |
| Ephb2        | 429.75          | -0.33        | 0.17        | -1.94        | 0.052           | 0.271           |
| Ephx2        | 11244.66        | 0.05         | 0.10        | 0.57         | 0.571           | 0.839           |
| Epor         | 114.96          | -0.47        | 0.26        | -1.85        | 0.065           | 0.305           |



|                      |                |              |             |              |                 |                 |
|----------------------|----------------|--------------|-------------|--------------|-----------------|-----------------|
| Errfi1               | 17191.18       | -0.45        | 0.16        | -2.91        | 3.59E-03        | 0.051           |
| Esr1                 | 499.13         | 0.05         | 0.16        | 0.31         | 0.760           | 0.924           |
| Esr2                 | 6.99           | -0.19        | 0.77        | -0.25        | 0.802           | NA              |
| <b>Esrrg</b>         | <b>2155.45</b> | <b>-0.51</b> | <b>0.16</b> | <b>-3.21</b> | <b>1.32E-03</b> | <b>0.027</b>    |
| Ezh2                 | 293.92         | 0.18         | 0.16        | 1.16         | 0.246           | 0.599           |
| F2                   | 11.13          | 0.22         | 1.08        | 0.21         | 0.836           | 0.949           |
| F2rl3                | 10.59          | 0.59         | 0.57        | 1.04         | 0.297           | 0.645           |
| F3                   | 450.74         | 0.29         | 0.12        | 2.34         | 0.019           | 0.152           |
| <b>Faah</b>          | <b>2015.74</b> | <b>-0.40</b> | <b>0.07</b> | <b>-5.69</b> | <b>1.24E-08</b> | <b>3.21E-06</b> |
| Fabp4                | 566.35         | 0.21         | 0.18        | 1.19         | 0.234           | 0.586           |
| Fam3a                | 762.43         | 0.12         | 0.11        | 1.07         | 0.285           | 0.637           |
| Fam3c                | 484.61         | -0.06        | 0.14        | -0.42        | 0.677           | 0.891           |
| Fancc                | 360.31         | -0.10        | 0.21        | -0.45        | 0.649           | 0.878           |
| Fasn                 | 3012.40        | 0.29         | 0.18        | 1.65         | 0.099           | 0.381           |
| Fbrs                 | 845.23         | -0.22        | 0.20        | -1.10        | 0.269           | 0.621           |
| Fbxo2                | 66.16          | -0.73        | 0.27        | -2.76        | 5.82E-03        | 0.071           |
| Fbxo8                | 2095.49        | 0.01         | 0.09        | 0.13         | 0.897           | 0.970           |
| Fbxw7                | 421.08         | -0.03        | 0.13        | -0.24        | 0.809           | 0.942           |
| Fgb                  | 37.82          | 0.72         | 0.51        | 1.40         | 0.161           | 0.487           |
| Fgf1                 | 7267.08        | 0.05         | 0.12        | 0.44         | 0.663           | 0.884           |
| Fgf2                 | 46.73          | 0.44         | 0.44        | 0.99         | 0.324           | 0.671           |
| Fgfbp3               | 41.43          | -0.45        | 0.28        | -1.63        | 0.102           | 0.387           |
| Fgl1                 | 34.02          | -0.19        | 0.37        | -0.51        | 0.607           | 0.857           |
| Fgr                  | 33.03          | -0.06        | 0.55        | -0.11        | 0.910           | 0.974           |
| Flt1                 | 1156.55        | 0.15         | 0.14        | 1.11         | 0.266           | 0.619           |
| Flvcr1               | 731.70         | 0.13         | 0.14        | 0.90         | 0.370           | 0.712           |
| Fmo3                 | 20.73          | 0.46         | 0.51        | 0.90         | 0.369           | 0.712           |
| <b b="" fn1<=""></b> | <b>1763.68</b> | <b>1.32</b>  | <b>0.17</b> | <b>7.85</b>  | <b>4.17E-15</b> | <b>8.39E-12</b> |
| Fn3k                 | 896.07         | 0.10         | 0.10        | 1.00         | 0.315           | 0.665           |
| Fos                  | 129.84         | 2.05         | 0.95        | 2.14         | 0.032           | 0.205           |
| <b>Fosb</b>          | <b>19.80</b>   | <b>3.55</b>  | <b>1.00</b> | <b>3.53</b>  | <b>4.10E-04</b> | <b>0.011</b>    |
| Foxk2                | 1627.79        | 0.02         | 0.09        | 0.25         | 0.806           | 0.941           |
| Foxm1                | 94.04          | 0.52         | 0.37        | 1.42         | 0.156           | 0.479           |
| Foxn3                | 2682.82        | -0.10        | 0.12        | -0.83        | 0.407           | 0.737           |
| Foxo1                | 2046.16        | -0.23        | 0.14        | -1.68        | 0.093           | 0.370           |
| Foxo3                | 4953.74        | -0.37        | 0.13        | -2.76        | 5.78E-03        | 0.071           |
| Fst                  | 428.57         | -0.52        | 0.18        | -2.84        | 4.48E-03        | 0.060           |
| Fto                  | 2546.57        | -0.13        | 0.10        | -1.36        | 0.172           | 0.505           |
| Ftsj1                | 663.88         | -0.09        | 0.10        | -0.89        | 0.373           | 0.714           |
| Ftsj3                | 1157.99        | -0.15        | 0.14        | -1.06        | 0.290           | 0.641           |
| Fzd4                 | 4805.45        | -0.04        | 0.08        | -0.44        | 0.656           | 0.881           |
| G6pc                 | 23460.77       | -0.22        | 0.16        | -1.35        | 0.179           | 0.513           |
| <b>Gabpa</b>         | <b>1260.76</b> | <b>-0.40</b> | <b>0.10</b> | <b>-3.93</b> | <b>8.35E-05</b> | <b>3.45E-03</b> |
| Gad1                 | 10.80          | 1.23         | 0.89        | 1.38         | 0.167           | 0.497           |
| Gal3st1              | 745.60         | -0.16        | 0.13        | -1.23        | 0.220           | 0.570           |

|             |                 |              |             |              |                 |                 |
|-------------|-----------------|--------------|-------------|--------------|-----------------|-----------------|
| Galnt2      | 2232.74         | 0.16         | 0.17        | 0.92         | 0.357           | 0.700           |
| <b>Gas6</b> | <b>14650.76</b> | <b>-0.25</b> | <b>0.07</b> | <b>-3.38</b> | <b>7.24E-04</b> | <b>0.017</b>    |
| Gata6       | 58.36           | 0.30         | 0.34        | 0.89         | 0.374           | 0.715           |
| Gcgr        | 768.36          | -0.32        | 0.13        | -2.46        | 0.014           | 0.123           |
| Gch1        | 43.84           | 0.45         | 0.25        | 1.80         | 0.072           | 0.324           |
| Gclc        | 7436.97         | 0.17         | 0.09        | 1.78         | 0.076           | 0.333           |
| Gde1        | 4274.97         | -0.08        | 0.09        | -0.83        | 0.406           | 0.737           |
| Gdf15       | 399.70          | 1.33         | 0.56        | 2.37         | 0.018           | 0.146           |
| Gfer        | 851.53          | 0.24         | 0.12        | 1.96         | 0.050           | 0.265           |
| Gfpt1       | 1928.80         | 0.10         | 0.09        | 1.07         | 0.283           | 0.636           |
| Gfpt2       | 48.88           | 0.24         | 0.32        | 0.75         | 0.451           | 0.768           |
| <b>Ggct</b> | <b>503.73</b>   | <b>0.92</b>  | <b>0.22</b> | <b>4.14</b>  | <b>3.51E-05</b> | <b>1.82E-03</b> |
| <b>Ggt1</b> | <b>24759.05</b> | <b>0.24</b>  | <b>0.07</b> | <b>3.53</b>  | <b>4.16E-04</b> | <b>0.011</b>    |
| Ghr         | 20737.07        | 0.11         | 0.09        | 1.15         | 0.249           | 0.602           |
| Gja1        | 103.17          | 0.31         | 0.27        | 1.13         | 0.258           | 0.609           |
| Glis3       | 2962.56         | -0.31        | 0.12        | -2.56        | 0.010           | 0.102           |
| Glo1        | 9816.07         | 0.10         | 0.10        | 0.93         | 0.354           | 0.697           |
| Glp1r       | 74.96           | 0.51         | 0.33        | 1.57         | 0.117           | 0.415           |
| Gls         | 6158.31         | 0.02         | 0.09        | 0.18         | 0.860           | 0.957           |
| Glul        | 30138.79        | 0.11         | 0.12        | 0.96         | 0.336           | 0.682           |
| Gorasp1     | 1385.11         | -0.22        | 0.17        | -1.26        | 0.206           | 0.551           |
| Gper1       | 54.27           | 0.24         | 0.29        | 0.83         | 0.409           | 0.739           |
| <b>Gpt</b>  | <b>1571.97</b>  | <b>0.46</b>  | <b>0.14</b> | <b>3.29</b>  | <b>1.01E-03</b> | <b>0.022</b>    |
| Gpx1        | 57959.64        | -0.06        | 0.13        | -0.47        | 0.642           | 0.873           |
| Grap2       | 23.98           | 0.71         | 0.75        | 0.95         | 0.342           | 0.687           |
| Grk2        | 1877.60         | 0.13         | 0.07        | 1.89         | 0.059           | 0.291           |
| Gsk3b       | 2516.00         | -0.13        | 0.15        | -0.84        | 0.402           | 0.734           |
| Gstt1       | 3507.77         | -0.31        | 0.11        | -2.85        | 4.42E-03        | 0.060           |
| Gusb        | 1235.91         | 0.05         | 0.14        | 0.35         | 0.725           | 0.910           |
| Gys1        | 1966.81         | 0.04         | 0.10        | 0.45         | 0.653           | 0.880           |
| Gys2        | 454.25          | -0.37        | 0.23        | -1.63        | 0.102           | 0.387           |
| Hcls1       | 127.17          | -0.09        | 0.25        | -0.34        | 0.733           | 0.913           |
| Hcn2        | 70.45           | 0.40         | 0.27        | 1.50         | 0.133           | 0.443           |
| Hcn4        | 5.79            | -0.97        | 0.78        | -1.24        | 0.215           | NA              |
| Hdac9       | 16.98           | 0.19         | 0.57        | 0.34         | 0.737           | 0.915           |
| Hes1        | 452.08          | -0.10        | 0.18        | -0.58        | 0.562           | 0.834           |
| Hgf         | 99.60           | -0.20        | 0.29        | -0.69        | 0.489           | 0.791           |
| Hhip        | 10.54           | 1.30         | 0.90        | 1.44         | 0.150           | 0.472           |
| Hif1a       | 3715.50         | 0.19         | 0.08        | 2.36         | 0.018           | 0.147           |
| Hipk2       | 3366.50         | -0.08        | 0.17        | -0.48        | 0.632           | 0.868           |
| Hk2         | 27.09           | 0.97         | 0.67        | 1.45         | 0.147           | 0.466           |
| Hkdc1       | 62.87           | 0.36         | 0.31        | 1.17         | 0.244           | 0.597           |
| Hmcn1       | 129.34          | 0.51         | 0.26        | 1.98         | 0.047           | 0.256           |
| Hmgb1       | 6290.43         | 0.15         | 0.10        | 1.61         | 0.108           | 0.396           |
| Hmgcr       | 1370.75         | -0.21        | 0.09        | -2.33        | 0.020           | 0.153           |

|                 |                 |              |             |              |                 |                 |
|-----------------|-----------------|--------------|-------------|--------------|-----------------|-----------------|
| Hmox1           | 1822.57         | 0.19         | 0.51        | 0.37         | 0.711           | 0.904           |
| Hnf1a           | 1825.90         | -0.06        | 0.13        | -0.46        | 0.646           | 0.876           |
| Hnf4a           | 42501.16        | -0.09        | 0.08        | -1.19        | 0.236           | 0.587           |
| Hnrnpa1         | 1761.34         | -0.04        | 0.12        | -0.37        | 0.711           | 0.904           |
| Hpgds           | 31.75           | 0.41         | 0.73        | 0.56         | 0.573           | 0.840           |
| Hpse            | 11.88           | 0.39         | 0.64        | 0.61         | 0.544           | 0.823           |
| Hsd11b1         | 2226.24         | 0.11         | 0.18        | 0.61         | 0.545           | 0.823           |
| <b>Hsf1</b>     | <b>1000.87</b>  | <b>0.26</b>  | <b>0.09</b> | <b>2.99</b>  | <b>2.83E-03</b> | <b>0.044</b>    |
| <b>Hsp90aa1</b> | <b>12234.05</b> | <b>0.54</b>  | <b>0.16</b> | <b>3.35</b>  | <b>8.18E-04</b> | <b>0.019</b>    |
| Hspa12a         | 843.59          | 0.05         | 0.17        | 0.29         | 0.774           | 0.929           |
| Hspa14          | 738.24          | 0.22         | 0.09        | 2.45         | 0.014           | 0.126           |
| Hspa14          | 68.78           | 0.14         | 0.27        | 0.52         | 0.604           | 0.856           |
| Hspa1a          | 1255.47         | 0.17         | 0.43        | 0.39         | 0.699           | 0.898           |
| Hspa1b          | 2194.53         | 0.38         | 0.43        | 0.87         | 0.383           | 0.721           |
| <b>Hspa4</b>    | <b>5182.54</b>  | <b>0.33</b>  | <b>0.07</b> | <b>4.42</b>  | <b>9.87E-06</b> | <b>7.04E-04</b> |
| Hspa5           | 15238.02        | 0.41         | 0.15        | 2.79         | 5.25E-03        | 0.066           |
| Hspb8           | 158.50          | 0.16         | 0.18        | 0.90         | 0.370           | 0.712           |
| <b>Hspd1</b>    | <b>15031.77</b> | <b>0.46</b>  | <b>0.09</b> | <b>4.88</b>  | <b>1.04E-06</b> | <b>1.18E-04</b> |
| Hspg2           | 2649.48         | 0.16         | 0.10        | 1.62         | 0.106           | 0.393           |
| Htr2a           | 9.45            | 1.63         | 0.58        | 2.78         | 5.38E-03        | 0.068           |
| Icam1           | 578.97          | -0.18        | 0.20        | -0.89        | 0.372           | 0.714           |
| Ide             | 3453.72         | 0.03         | 0.07        | 0.37         | 0.710           | 0.904           |
| <b>Iffi30</b>   | <b>1675.69</b>  | <b>0.27</b>  | <b>0.08</b> | <b>3.55</b>  | <b>3.84E-04</b> | <b>0.011</b>    |
| Igf1            | 122.34          | -0.69        | 0.34        | -2.04        | 0.041           | 0.237           |
| Igf1r           | 10781.07        | -0.05        | 0.14        | -0.36        | 0.716           | 0.907           |
| Igf2            | 23.56           | -0.53        | 0.62        | -0.85        | 0.394           | 0.728           |
| Igf2bp2         | 323.97          | 0.29         | 0.17        | 1.71         | 0.087           | 0.356           |
| <b>Igfbp1</b>   | <b>168.84</b>   | <b>-1.54</b> | <b>0.40</b> | <b>-3.89</b> | <b>1.01E-04</b> | <b>3.90E-03</b> |
| Igfbp2          | 21.15           | 0.88         | 0.73        | 1.20         | 0.229           | 0.580           |
| <b>Igfbp3</b>   | <b>2740.86</b>  | <b>-0.73</b> | <b>0.18</b> | <b>-4.10</b> | <b>4.15E-05</b> | <b>2.04E-03</b> |
| <b>Igfbp7</b>   | <b>23023.58</b> | <b>-0.39</b> | <b>0.09</b> | <b>-4.17</b> | <b>3.07E-05</b> | <b>1.63E-03</b> |
| Ikbkb           | 1832.02         | 0.03         | 0.10        | 0.27         | 0.784           | 0.933           |
| Il18            | 42.29           | -0.07        | 0.31        | -0.23        | 0.821           | 0.944           |
| Il1b            | 70.00           | 0.36         | 0.93        | 0.39         | 0.698           | 0.898           |
| Il1r1           | 214.45          | -0.17        | 0.19        | -0.88        | 0.381           | 0.720           |
| Il1rn           | 11.30           | -0.05        | 0.95        | -0.05        | 0.960           | 0.989           |
| Il2rb           | 36.95           | 0.62         | 0.56        | 1.10         | 0.273           | 0.625           |
| Il33            | 344.70          | 0.15         | 0.20        | 0.77         | 0.444           | 0.763           |
| Il7r            | 9.22            | 0.75         | 0.71        | 1.05         | 0.292           | 0.642           |
| Inpp5f          | 2196.56         | -0.04        | 0.08        | -0.48        | 0.631           | 0.868           |
| Insr            | 5426.24         | -0.06        | 0.12        | -0.50        | 0.614           | 0.860           |
| Insr            | 711.46          | -0.17        | 0.16        | -1.09        | 0.276           | 0.628           |
| Intu            | 708.11          | 0.25         | 0.19        | 1.37         | 0.170           | 0.500           |
| Irf3            | 1330.97         | 0.08         | 0.10        | 0.85         | 0.396           | 0.729           |
| Irf8            | 693.48          | 0.42         | 0.18        | 2.30         | 0.021           | 0.159           |

|              |                |              |             |              |                 |                 |
|--------------|----------------|--------------|-------------|--------------|-----------------|-----------------|
| Irs1         | 1114.39        | -0.13        | 0.15        | -0.83        | 0.404           | 0.736           |
| Irs2         | 1441.08        | -0.20        | 0.32        | -0.64        | 0.525           | 0.813           |
| Itga2        | 31.01          | 0.04         | 0.80        | 0.05         | 0.957           | 0.988           |
| Jag1         | 941.49         | 0.19         | 0.14        | 1.36         | 0.175           | 0.509           |
| Jak2         | 1274.38        | -0.09        | 0.08        | -1.21        | 0.228           | 0.578           |
| Jun          | 1754.33        | 0.94         | 0.41        | 2.32         | 0.020           | 0.154           |
| Junb         | 635.76         | 0.39         | 0.52        | 0.75         | 0.453           | 0.769           |
| Jund         | 4292.92        | -0.20        | 0.12        | -1.72        | 0.085           | 0.354           |
| <b>Kat2b</b> | <b>3481.20</b> | <b>-0.22</b> | <b>0.07</b> | <b>-2.96</b> | <b>3.09E-03</b> | <b>0.046</b>    |
| Kcnh2        | 36.96          | 0.14         | 0.50        | 0.28         | 0.779           | 0.931           |
| Kcnj11       | 29.18          | 0.91         | 0.52        | 1.76         | 0.079           | 0.340           |
| Kcnq1        | 1066.78        | -0.19        | 0.15        | -1.25        | 0.211           | 0.559           |
| Kdm1a        | 1164.35        | 0.25         | 0.09        | 2.86         | 4.19E-03        | 0.058           |
| Kdr          | 1558.34        | 0.15         | 0.15        | 0.95         | 0.340           | 0.686           |
| Khsrp        | 2614.46        | 0.02         | 0.10        | 0.24         | 0.811           | 0.942           |
| Kl           | 21326.57       | -0.06        | 0.12        | -0.51        | 0.608           | 0.857           |
| Klf10        | 709.52         | -0.31        | 0.26        | -1.21        | 0.225           | 0.575           |
| Klf11        | 350.59         | -0.30        | 0.25        | -1.20        | 0.229           | 0.579           |
| <b>Klf15</b> | <b>3999.86</b> | <b>-0.62</b> | <b>0.15</b> | <b>-3.98</b> | <b>6.84E-05</b> | <b>2.94E-03</b> |
| Klf2         | 179.51         | 0.18         | 0.22        | 0.78         | 0.433           | 0.754           |
| Klf4         | 217.75         | 0.07         | 0.20        | 0.33         | 0.743           | 0.917           |
| <b>Klf9</b>  | <b>6788.45</b> | <b>-0.43</b> | <b>0.12</b> | <b>-3.52</b> | <b>4.34E-04</b> | <b>0.012</b>    |
| Klrk1        | 20.95          | -0.52        | 0.58        | -0.89        | 0.374           | 0.715           |
| Kmt2a        | 1976.69        | -0.10        | 0.30        | -0.32        | 0.749           | 0.920           |
| Kng1         | 45.75          | 0.10         | 0.39        | 0.26         | 0.796           | 0.937           |
| Kras         | 1257.10        | 0.12         | 0.11        | 1.05         | 0.293           | 0.643           |
| <b>Krt20</b> | <b>22.80</b>   | <b>1.41</b>  | <b>0.46</b> | <b>3.05</b>  | <b>2.28E-03</b> | <b>0.038</b>    |
| Ldha         | 16500.45       | 0.17         | 0.07        | 2.56         | 0.011           | 0.103           |
| Ldlr         | 533.86         | -0.22        | 0.19        | -1.16        | 0.248           | 0.600           |
| Lep          | 30.83          | -0.63        | 2.06        | -0.30        | 0.761           | 0.925           |
| Lepr         | 104.62         | 0.09         | 0.26        | 0.33         | 0.743           | 0.917           |
| Lgals1       | 605.61         | 0.05         | 0.12        | 0.40         | 0.690           | 0.895           |
| Lgals3       | 927.65         | -0.27        | 0.15        | -1.74        | 0.082           | 0.348           |
| Lgr6         | 24.70          | -1.15        | 0.44        | -2.62        | 8.72E-03        | 0.092           |
| Lipe         | 673.68         | 0.19         | 0.16        | 1.14         | 0.252           | 0.605           |
| Lonp1        | 5163.65        | 0.12         | 0.09        | 1.31         | 0.190           | 0.527           |
| Lox          | 93.54          | -0.02        | 0.22        | -0.08        | 0.935           | 0.981           |
| Lpar2        | 446.02         | 0.01         | 0.24        | 0.05         | 0.960           | 0.989           |
| Lpar3        | 1174.75        | -0.20        | 0.13        | -1.51        | 0.131           | 0.438           |
| Lpcat3       | 2372.34        | 0.02         | 0.09        | 0.22         | 0.829           | 0.947           |
| <b>Lpl</b>   | <b>7142.27</b> | <b>-0.67</b> | <b>0.12</b> | <b>-5.47</b> | <b>4.53E-08</b> | <b>9.49E-06</b> |
| Lrba         | 7167.32        | -0.19        | 0.11        | -1.82        | 0.069           | 0.315           |
| Lrp5         | 2264.59        | -0.25        | 0.12        | -2.02        | 0.043           | 0.245           |
| Ltbr         | 2769.81        | -0.09        | 0.10        | -0.90        | 0.370           | 0.712           |
| Luc7l3       | 852.78         | 0.47         | 0.18        | 2.66         | 7.76E-03        | 0.086           |

|               |                |             |             |             |                 |                 |
|---------------|----------------|-------------|-------------|-------------|-----------------|-----------------|
| Ly96          | 26.41          | -0.20       | 0.31        | -0.65       | 0.518           | 0.809           |
| <b>Mad212</b> | <b>354.86</b>  | <b>0.54</b> | <b>0.16</b> | <b>3.34</b> | <b>8.36E-04</b> | <b>0.019</b>    |
| Malat1        | 99348.94       | 0.17        | 0.30        | 0.58        | 0.559           | 0.832           |
| Map2          | 133.67         | 0.36        | 0.32        | 1.12        | 0.263           | 0.615           |
| Map2k6        | 521.63         | -0.25       | 0.17        | -1.53       | 0.127           | 0.433           |
| Map2k7        | 1024.25        | 0.04        | 0.09        | 0.43        | 0.669           | 0.889           |
| Map3k5        | 3553.99        | 0.18        | 0.14        | 1.32        | 0.188           | 0.525           |
| Map4k4        | 1098.04        | 0.29        | 0.16        | 1.84        | 0.066           | 0.308           |
| Mapk1         | 4298.00        | -0.11       | 0.10        | -1.15       | 0.249           | 0.602           |
| Mapk14        | 4265.11        | -0.15       | 0.09        | -1.69       | 0.092           | 0.367           |
| Mapk3         | 1956.99        | -0.19       | 0.07        | -2.60       | 9.28E-03        | 0.095           |
| Mapk7         | 260.56         | 0.10        | 0.13        | 0.81        | 0.417           | 0.743           |
| Mapk8         | 537.14         | 0.07        | 0.13        | 0.56        | 0.577           | 0.843           |
| Mapt          | 4579.08        | -0.06       | 0.12        | -0.50       | 0.615           | 0.861           |
| Mbd2          | 1985.04        | -0.04       | 0.06        | -0.63       | 0.530           | 0.814           |
| Mbl2          | 8.21           | 0.01        | 0.66        | 0.01        | 0.991           | NA              |
| Mcat          | 1114.90        | -0.04       | 0.11        | -0.39       | 0.700           | 0.899           |
| Mcts1         | 339.74         | 0.00        | 0.13        | 0.01        | 0.989           | 0.996           |
| Mdm2          | 1271.31        | 0.07        | 0.10        | 0.78        | 0.436           | 0.756           |
| Mdm4          | 1053.89        | -0.19       | 0.17        | -1.09       | 0.275           | 0.627           |
| Men1          | 1455.65        | 0.15        | 0.09        | 1.66        | 0.097           | 0.377           |
| Metap2        | 3287.65        | 0.15        | 0.13        | 1.10        | 0.272           | 0.625           |
| Mfge8         | 2202.71        | -0.29       | 0.15        | -1.90       | 0.057           | 0.287           |
| Mgam          | 5952.88        | -0.09       | 0.14        | -0.66       | 0.511           | 0.804           |
| Micu1         | 2212.82        | -0.15       | 0.06        | -2.45       | 0.014           | 0.125           |
| Mitf          | 728.94         | -0.06       | 0.12        | -0.50       | 0.620           | 0.862           |
| Mlxipl        | 2370.95        | 0.20        | 0.17        | 1.20        | 0.230           | 0.580           |
| <b>Mmp2</b>   | <b>110.02</b>  | <b>1.10</b> | <b>0.31</b> | <b>3.56</b> | <b>3.76E-04</b> | <b>0.011</b>    |
| Mmp7          | 39.31          | 2.19        | 1.95        | 1.12        | 0.261           | 0.613           |
| <b>Mmp9</b>   | <b>35.63</b>   | <b>2.13</b> | <b>0.58</b> | <b>3.66</b> | <b>2.52E-04</b> | <b>8.00E-03</b> |
| Mmrn1         | 39.89          | -0.16       | 0.37        | -0.44       | 0.661           | 0.883           |
| Mok           | 204.78         | -0.57       | 0.22        | -2.63       | 8.58E-03        | 0.091           |
| Mpg           | 437.68         | -0.25       | 0.17        | -1.51       | 0.131           | 0.439           |
| Mrap2         | 5.80           | 0.01        | 0.86        | 0.01        | 0.994           | NA              |
| Msi2          | 3412.31        | -0.27       | 0.10        | -2.81       | 4.96E-03        | 0.064           |
| Mta2          | 2261.56        | 0.00        | 0.07        | 0.03        | 0.974           | 0.992           |
| Mthfr         | 1126.70        | 0.10        | 0.16        | 0.63        | 0.527           | 0.813           |
| <b>Mtmr11</b> | <b>2182.79</b> | <b>0.50</b> | <b>0.10</b> | <b>5.12</b> | <b>3.07E-07</b> | <b>4.19E-05</b> |
| <b>Mtor</b>   | <b>9833.42</b> | <b>0.28</b> | <b>0.09</b> | <b>3.24</b> | <b>1.20E-03</b> | <b>0.025</b>    |
| <b>Myc</b>    | <b>310.75</b>  | <b>1.29</b> | <b>0.20</b> | <b>6.47</b> | <b>9.79E-11</b> | <b>4.64E-08</b> |
| Myd88         | 571.70         | 0.22        | 0.11        | 2.05        | 0.041           | 0.235           |
| Mylk          | 2848.22        | -0.11       | 0.13        | -0.82       | 0.412           | 0.740           |
| Nampt         | 6942.25        | 0.17        | 0.10        | 1.64        | 0.100           | 0.383           |
| Ncf1          | 72.34          | -0.05       | 0.36        | -0.13       | 0.895           | 0.970           |
| Nck1          | 670.01         | 0.14        | 0.13        | 1.08        | 0.282           | 0.634           |

|              |                |              |             |              |                 |                 |
|--------------|----------------|--------------|-------------|--------------|-----------------|-----------------|
| Ncoa1        | 2289.71        | -0.14        | 0.12        | -1.18        | 0.239           | 0.591           |
| Ncoa2        | 3235.81        | 0.10         | 0.11        | 0.88         | 0.377           | 0.717           |
| Nedd4l       | 3193.79        | 0.01         | 0.14        | 0.10         | 0.922           | 0.978           |
| Nes          | 507.60         | -0.08        | 0.20        | -0.41        | 0.681           | 0.893           |
| Neu1         | 13759.25       | -0.26        | 0.11        | -2.46        | 0.014           | 0.124           |
| Nexn         | 32.69          | 0.27         | 0.39        | 0.68         | 0.498           | 0.796           |
| Nfat5        | 2076.83        | -0.10        | 0.19        | -0.52        | 0.604           | 0.856           |
| Nfe2         | 8.06           | -0.74        | 0.78        | -0.95        | 0.343           | NA              |
| Nfe2l2       | 3118.94        | 0.20         | 0.08        | 2.38         | 0.018           | 0.143           |
| <b>Nfil3</b> | <b>653.62</b>  | <b>1.08</b>  | <b>0.20</b> | <b>5.27</b>  | <b>1.35E-07</b> | <b>2.32E-05</b> |
| Nfkb1        | 1226.33        | 0.10         | 0.09        | 1.17         | 0.243           | 0.596           |
| Nfkbia       | 953.09         | -0.03        | 0.33        | -0.08        | 0.934           | 0.981           |
| Ngdn         | 811.04         | 0.18         | 0.10        | 1.78         | 0.074           | 0.329           |
| Ngf          | 41.04          | 0.37         | 0.36        | 1.03         | 0.302           | 0.652           |
| Nlrc4        | 67.63          | 0.12         | 0.28        | 0.45         | 0.653           | 0.880           |
| Nlrp3        | 21.58          | 0.56         | 0.57        | 0.98         | 0.326           | 0.674           |
| Nod2         | 63.95          | -0.38        | 0.31        | -1.22        | 0.221           | 0.570           |
| Nos1         | 101.05         | -0.55        | 0.38        | -1.46        | 0.145           | 0.464           |
| Nos2         | 23.06          | -0.65        | 0.68        | -0.95        | 0.340           | 0.686           |
| Nos3         | 121.67         | -0.08        | 0.18        | -0.46        | 0.642           | 0.873           |
| Notch1       | 1013.77        | -0.19        | 0.14        | -1.32        | 0.186           | 0.522           |
| Nox4         | 18536.08       | -0.13        | 0.13        | -0.97        | 0.332           | 0.679           |
| Npy          | 22.22          | -0.26        | 0.43        | -0.60        | 0.546           | 0.824           |
| <b>Nqo1</b>  | <b>2519.13</b> | <b>-0.36</b> | <b>0.10</b> | <b>-3.44</b> | <b>5.82E-04</b> | <b>0.015</b>    |
| Nr1h2        | 2436.69        | -0.10        | 0.08        | -1.26        | 0.206           | 0.551           |
| Nr3c1        | 4523.55        | -0.01        | 0.09        | -0.11        | 0.913           | 0.975           |
| Nr3c2        | 892.30         | -0.02        | 0.15        | -0.10        | 0.917           | 0.976           |
| Nr4a1        | 273.83         | 1.02         | 0.80        | 1.28         | 0.202           | 0.543           |
| Nr4a2        | 13.90          | 0.25         | 0.49        | 0.50         | 0.618           | 0.861           |
| Nrg4         | 34.86          | 0.68         | 0.41        | 1.63         | 0.102           | 0.387           |
| Nrtn         | 225.79         | -0.56        | 0.20        | -2.82        | 4.86E-03        | 0.063           |
| Nsa2         | 2617.86        | 0.12         | 0.11        | 1.02         | 0.309           | 0.659           |
| Nt5c2        | 2374.63        | 0.25         | 0.09        | 2.84         | 4.52E-03        | 0.061           |
| Nucb2        | 466.85         | -0.11        | 0.14        | -0.78        | 0.437           | 0.757           |
| Ogg1         | 321.63         | -0.07        | 0.14        | -0.47        | 0.639           | 0.871           |
| <b>Opa1</b>  | <b>4962.63</b> | <b>-0.39</b> | <b>0.07</b> | <b>-5.25</b> | <b>1.51E-07</b> | <b>2.46E-05</b> |
| Orai1        | 433.30         | -0.16        | 0.12        | -1.31        | 0.191           | 0.528           |
| <b>P2rx1</b> | <b>145.41</b>  | <b>0.65</b>  | <b>0.21</b> | <b>3.04</b>  | <b>2.34E-03</b> | <b>0.039</b>    |
| P2rx3        | 19.08          | 1.16         | 0.86        | 1.35         | 0.176           | 0.511           |
| P2rx4        | 1849.96        | -0.16        | 0.12        | -1.35        | 0.178           | 0.512           |
| P2rx5        | 109.27         | 0.22         | 0.23        | 0.96         | 0.336           | 0.681           |
| P2rx7        | 58.33          | 0.47         | 0.41        | 1.14         | 0.255           | 0.607           |
| P2ry1        | 234.77         | -0.10        | 0.14        | -0.70        | 0.484           | 0.789           |
| P2ry12       | 10.11          | 0.03         | 0.76        | 0.03         | 0.973           | 0.992           |
| <b>P2ry2</b> | <b>288.82</b>  | <b>-0.60</b> | <b>0.19</b> | <b>-3.21</b> | <b>1.32E-03</b> | <b>0.027</b>    |

|              |                  |              |             |              |                 |                 |
|--------------|------------------|--------------|-------------|--------------|-----------------|-----------------|
| <b>Pak1</b>  | <b>1608.12</b>   | <b>-0.50</b> | <b>0.08</b> | <b>-6.22</b> | <b>4.93E-10</b> | <b>1.85E-07</b> |
| Parp1        | 1917.85          | 0.15         | 0.09        | 1.66         | 0.098           | 0.379           |
| Pawr         | 960.39           | 0.36         | 0.13        | 2.77         | 5.67E-03        | 0.070           |
| <b>Pck1</b>  | <b>161998.72</b> | <b>0.54</b>  | <b>0.18</b> | <b>3.03</b>  | <b>2.48E-03</b> | <b>0.040</b>    |
| Pck2         | 771.94           | 0.31         | 0.15        | 2.09         | 0.037           | 0.222           |
| Pcna         | 1093.70          | 0.12         | 0.12        | 0.99         | 0.321           | 0.669           |
| Pcsk9        | 143.11           | 0.07         | 0.25        | 0.30         | 0.766           | 0.926           |
| Pde5a        | 315.62           | -0.15        | 0.18        | -0.85        | 0.397           | 0.730           |
| Pdhx         | 1582.27          | 0.16         | 0.11        | 1.44         | 0.150           | 0.471           |
| Pdk1         | 2637.68          | 0.19         | 0.12        | 1.63         | 0.103           | 0.387           |
| Pdk4         | 989.14           | -0.06        | 0.47        | -0.13        | 0.894           | 0.969           |
| Pdpm         | 264.92           | -0.44        | 0.17        | -2.66        | 7.86E-03        | 0.086           |
| Pecam1       | 1035.51          | 0.27         | 0.15        | 1.80         | 0.073           | 0.324           |
| Pes1         | 1930.82          | 0.14         | 0.07        | 1.96         | 0.050           | 0.267           |
| Pfkm         | 2318.32          | 0.00         | 0.08        | -0.04        | 0.972           | 0.992           |
| Phlpp1       | 1186.23          | -0.07        | 0.13        | -0.54        | 0.590           | 0.848           |
| Pick1        | 743.93           | 0.07         | 0.11        | 0.64         | 0.525           | 0.813           |
| Pid1         | 106.49           | 0.23         | 0.36        | 0.65         | 0.514           | 0.807           |
| Pik3ca       | 3310.51          | 0.11         | 0.16        | 0.68         | 0.498           | 0.796           |
| Pik3cb       | 1369.19          | 0.02         | 0.08        | 0.27         | 0.784           | 0.933           |
| Pik3cd       | 109.50           | -0.12        | 0.40        | -0.30        | 0.762           | 0.925           |
| Pik3cg       | 56.26            | 0.08         | 0.33        | 0.23         | 0.820           | 0.944           |
| Pik3r1       | 2514.69          | 0.20         | 0.11        | 1.88         | 0.060           | 0.293           |
| Pim1         | 229.08           | -0.35        | 0.24        | -1.44        | 0.149           | 0.469           |
| Pin1         | 1104.11          | -0.22        | 0.12        | -1.88        | 0.060           | 0.293           |
| Pin4         | 133.24           | 0.22         | 0.32        | 0.67         | 0.506           | 0.801           |
| Pkm          | 11688.31         | -0.22        | 0.08        | -2.76        | 5.73E-03        | 0.070           |
| Pla2g6       | 936.69           | 0.03         | 0.15        | 0.19         | 0.848           | 0.952           |
| Plagl1       | 294.67           | -0.40        | 0.26        | -1.55        | 0.122           | 0.422           |
| Plat         | 934.09           | -0.03        | 0.17        | -0.15        | 0.879           | 0.963           |
| Plaur        | 113.14           | -0.23        | 0.27        | -0.83        | 0.407           | 0.737           |
| Plg          | 43.55            | 0.71         | 0.43        | 1.65         | 0.100           | 0.382           |
| <b>Plin2</b> | <b>3938.68</b>   | <b>0.76</b>  | <b>0.14</b> | <b>5.48</b>  | <b>4.34E-08</b> | <b>9.31E-06</b> |
| Pltp         | 142.29           | 0.05         | 0.26        | 0.18         | 0.860           | 0.957           |
| Plxna1       | 1705.98          | -0.27        | 0.15        | -1.87        | 0.061           | 0.295           |
| Pml          | 926.61           | -0.08        | 0.13        | -0.59        | 0.553           | 0.829           |
| Pnpla3       | 8.81             | -1.21        | 0.87        | -1.39        | 0.165           | 0.493           |
| Pnpo         | 3283.52          | -0.03        | 0.07        | -0.38        | 0.705           | 0.902           |
| Pold4        | 358.73           | 0.04         | 0.15        | 0.28         | 0.776           | 0.930           |
| Poldip2      | 4466.44          | 0.00         | 0.08        | -0.03        | 0.979           | 0.993           |
| Pole4        | 559.46           | -0.10        | 0.15        | -0.68        | 0.497           | 0.796           |
| Pomc         | 17.66            | 0.21         | 0.48        | 0.44         | 0.663           | 0.884           |
| Pon2         | 400.17           | 0.06         | 0.15        | 0.42         | 0.672           | 0.890           |
| Ppara        | 3319.92          | -0.23        | 0.17        | -1.36        | 0.174           | 0.507           |
| Ppard        | 754.04           | 0.32         | 0.20        | 1.54         | 0.123           | 0.425           |

|              |                |              |             |              |                 |                 |
|--------------|----------------|--------------|-------------|--------------|-----------------|-----------------|
| Pparg        | 62.97          | -1.07        | 0.54        | -1.99        | 0.046           | 0.254           |
| Ppargc1a     | 3310.36        | -0.24        | 0.10        | -2.48        | 0.013           | 0.120           |
| Ppia         | 12920.67       | 0.06         | 0.11        | 0.50         | 0.617           | 0.861           |
| Ppid         | 585.92         | 0.20         | 0.12        | 1.65         | 0.098           | 0.379           |
| <b>Ppif</b>  | <b>2088.26</b> | <b>0.27</b>  | <b>0.07</b> | <b>3.63</b>  | <b>2.79E-04</b> | <b>8.59E-03</b> |
| Ppp1r11      | 847.23         | -0.17        | 0.15        | -1.13        | 0.260           | 0.612           |
| Ppp2ca       | 6380.83        | 0.08         | 0.06        | 1.40         | 0.160           | 0.485           |
| Prdx6        | 5757.67        | 0.06         | 0.08        | 0.67         | 0.505           | 0.801           |
| Prkaa1       | 1064.98        | -0.02        | 0.07        | -0.29        | 0.773           | 0.929           |
| Prkaa2       | 9279.20        | 0.00         | 0.08        | 0.00         | 1.000           | 1.000           |
| Prkab1       | 1298.73        | -0.04        | 0.09        | -0.46        | 0.645           | 0.875           |
| <b>Prkca</b> | <b>640.62</b>  | <b>-0.69</b> | <b>0.21</b> | <b>-3.30</b> | <b>9.72E-04</b> | <b>0.021</b>    |
| Prkcb        | 44.11          | 0.29         | 0.38        | 0.75         | 0.453           | 0.769           |
| Prkcd        | 2461.21        | -0.08        | 0.07        | -1.20        | 0.230           | 0.581           |
| <b>Prkci</b> | <b>1461.19</b> | <b>0.20</b>  | <b>0.06</b> | <b>3.08</b>  | <b>2.05E-03</b> | <b>0.036</b>    |
| Prkcz        | 4165.16        | -0.12        | 0.07        | -1.72        | 0.086           | 0.355           |
| Prkd1        | 310.23         | -0.16        | 0.12        | -1.40        | 0.163           | 0.489           |
| Prmt1        | 1449.49        | -0.01        | 0.10        | -0.05        | 0.957           | 0.988           |
| <b>Prom1</b> | <b>3443.84</b> | <b>-0.85</b> | <b>0.11</b> | <b>-7.56</b> | <b>4.03E-14</b> | <b>5.90E-11</b> |
| Prox1        | 450.58         | -0.09        | 0.22        | -0.40        | 0.693           | 0.896           |
| Psip1        | 580.75         | 0.11         | 0.13        | 0.84         | 0.399           | 0.732           |
| <b>Ptbp2</b> | <b>443.44</b>  | <b>-0.61</b> | <b>0.17</b> | <b>-3.56</b> | <b>3.70E-04</b> | <b>0.011</b>    |
| Ptch1        | 1242.65        | 0.01         | 0.16        | 0.05         | 0.963           | 0.990           |
| Pten         | 6162.51        | 0.10         | 0.07        | 1.41         | 0.159           | 0.483           |
| Ptgds        | 127.90         | -0.80        | 0.31        | -2.55        | 0.011           | 0.103           |
| Ptgs1        | 692.81         | -0.10        | 0.12        | -0.80        | 0.422           | 0.747           |
| Ptgs2        | 40.68          | -0.15        | 0.39        | -0.39        | 0.696           | 0.898           |
| Ptk2b        | 3285.82        | -0.08        | 0.10        | -0.78        | 0.437           | 0.756           |
| Ptpa         | 3839.26        | -0.08        | 0.09        | -0.95        | 0.342           | 0.687           |
| <b>Ptpn1</b> | <b>1924.64</b> | <b>-0.40</b> | <b>0.11</b> | <b>-3.77</b> | <b>1.64E-04</b> | <b>5.73E-03</b> |
| Ptpn2        | 495.50         | 0.29         | 0.11        | 2.60         | 9.27E-03        | 0.095           |
| Ptpn4        | 1979.49        | 0.02         | 0.18        | 0.09         | 0.929           | 0.980           |
| Ptpn9        | 1288.48        | -0.17        | 0.07        | -2.52        | 0.012           | 0.112           |
| Ptpru        | 505.39         | -0.06        | 0.18        | -0.34        | 0.733           | 0.913           |
| Ptrh1        | 118.75         | -0.05        | 0.22        | -0.23        | 0.817           | 0.943           |
| Rab10        | 3068.27        | 0.00         | 0.08        | 0.04         | 0.965           | 0.991           |
| Rab8a        | 2617.99        | 0.10         | 0.17        | 0.61         | 0.545           | 0.823           |
| Rac1         | 5185.66        | 0.06         | 0.07        | 0.90         | 0.370           | 0.712           |
| Rack1        | 15572.10       | 0.04         | 0.11        | 0.32         | 0.751           | 0.920           |
| Rapgef5      | 549.11         | 0.12         | 0.15        | 0.84         | 0.400           | 0.732           |
| Rara         | 758.65         | -0.28        | 0.12        | -2.34        | 0.019           | 0.151           |
| Rasgrp1      | 254.01         | 0.05         | 0.19        | 0.29         | 0.775           | 0.930           |
| Rbm45        | 867.31         | 0.13         | 0.11        | 1.12         | 0.262           | 0.614           |
| Rbp4         | 20.26          | 0.34         | 0.65        | 0.53         | 0.595           | 0.850           |
| Rcan1        | 3358.89        | 0.55         | 0.31        | 1.78         | 0.075           | 0.330           |



|               |                |              |             |              |                 |                 |
|---------------|----------------|--------------|-------------|--------------|-----------------|-----------------|
| Rcbbt1        | 1529.19        | -0.25        | 0.13        | -2.02        | 0.043           | 0.243           |
| Rela          | 1063.67        | 0.33         | 0.12        | 2.74         | 6.12E-03        | 0.073           |
| Renbp         | 1921.10        | -0.06        | 0.12        | -0.49        | 0.624           | 0.864           |
| Retn          | 15.60          | -1.01        | 1.85        | -0.55        | 0.585           | 0.846           |
| <b>Retsat</b> | <b>9820.20</b> | <b>-0.55</b> | <b>0.12</b> | <b>-4.73</b> | <b>2.29E-06</b> | <b>2.23E-04</b> |
| Rfc1          | 1260.83        | 0.01         | 0.11        | 0.14         | 0.890           | 0.967           |
| Rheb          | 2242.11        | 0.21         | 0.07        | 2.82         | 4.75E-03        | 0.063           |
| Rhot1         | 2475.02        | 0.10         | 0.06        | 1.55         | 0.121           | 0.422           |
| Ripk1         | 1303.65        | -0.20        | 0.08        | -2.63        | 8.48E-03        | 0.090           |
| Ripk2         | 152.75         | -0.25        | 0.17        | -1.43        | 0.152           | 0.475           |
| Rnf10         | 9952.51        | 0.03         | 0.06        | 0.52         | 0.605           | 0.856           |
| Rnf19a        | 1617.17        | -0.01        | 0.07        | -0.15        | 0.882           | 0.964           |
| Robo4         | 290.27         | 0.24         | 0.16        | 1.54         | 0.123           | 0.426           |
| Rock1         | 2164.67        | 0.20         | 0.12        | 1.66         | 0.096           | 0.376           |
| <b>Rorc</b>   | <b>3973.33</b> | <b>0.74</b>  | <b>0.14</b> | <b>5.23</b>  | <b>1.67E-07</b> | <b>2.66E-05</b> |
| Ros1          | 9.70           | -1.25        | 0.62        | -2.01        | 0.044           | 0.246           |
| Rpain         | 555.16         | -0.44        | 0.16        | -2.77        | 5.52E-03        | 0.069           |
| Rpl10         | 1044.53        | -0.18        | 0.18        | -1.04        | 0.298           | 0.646           |
| Rpl29         | 10473.55       | 0.02         | 0.11        | 0.19         | 0.847           | 0.952           |
| Rpl36a        | 1122.03        | 0.07         | 0.19        | 0.37         | 0.715           | 0.906           |
| Rps19         | 8509.70        | 0.04         | 0.11        | 0.34         | 0.737           | 0.915           |
| Rps6kb1       | 865.41         | 0.10         | 0.13        | 0.76         | 0.445           | 0.764           |
| <b>Rptor</b>  | <b>1699.39</b> | <b>-0.26</b> | <b>0.09</b> | <b>-3.02</b> | <b>2.49E-03</b> | <b>0.040</b>    |
| Runx2         | 34.41          | 1.54         | 0.56        | 2.73         | 6.24E-03        | 0.074           |
| S100a1        | 6939.04        | -0.11        | 0.11        | -0.97        | 0.332           | 0.679           |
| S100a8        | 43.36          | -0.02        | 1.16        | -0.02        | 0.986           | 0.995           |
| S1pr1         | 231.45         | 0.00         | 0.27        | 0.00         | 0.996           | 0.999           |
| S1pr2         | 114.58         | 0.22         | 0.31        | 0.71         | 0.481           | 0.787           |
| S1pr3         | 303.07         | -0.14        | 0.20        | -0.70        | 0.482           | 0.788           |
| Sat1          | 6646.79        | -0.03        | 0.13        | -0.24        | 0.812           | 0.942           |
| Scp2          | 23453.55       | -0.09        | 0.07        | -1.28        | 0.199           | 0.540           |
| Scpep1        | 3398.30        | 0.13         | 0.08        | 1.73         | 0.083           | 0.349           |
| Scube1        | 52.13          | 0.24         | 0.50        | 0.49         | 0.627           | 0.866           |
| <b>Sdc2</b>   | <b>3148.48</b> | <b>0.37</b>  | <b>0.08</b> | <b>4.47</b>  | <b>7.85E-06</b> | <b>6.01E-04</b> |
| Sdc4          | 11784.04       | -0.05        | 0.07        | -0.76        | 0.449           | 0.766           |
| Sele          | 14.04          | -0.25        | 0.60        | -0.41        | 0.681           | 0.893           |
| Selenop       | 61704.86       | -0.30        | 0.17        | -1.75        | 0.080           | 0.343           |
| Selp          | 11.91          | 0.47         | 0.82        | 0.58         | 0.565           | 0.835           |
| <b>Sema3c</b> | <b>2307.42</b> | <b>0.57</b>  | <b>0.15</b> | <b>3.91</b>  | <b>9.31E-05</b> | <b>3.68E-03</b> |
| Sema6a        | 532.09         | 0.48         | 0.17        | 2.80         | 5.06E-03        | 0.065           |
| Serp1         | 5619.43        | 0.03         | 0.10        | 0.25         | 0.804           | 0.941           |
| Serpine1      | 48.80          | 1.09         | 0.48        | 2.27         | 0.023           | 0.167           |
| Serpinf1      | 25.95          | 0.96         | 0.56        | 1.70         | 0.088           | 0.360           |
| Setd2         | 2832.91        | 0.40         | 0.15        | 2.66         | 7.91E-03        | 0.087           |
| Setd7         | 873.68         | 0.24         | 0.22        | 1.08         | 0.279           | 0.631           |

|                |                 |              |             |              |                 |                 |
|----------------|-----------------|--------------|-------------|--------------|-----------------|-----------------|
| Sgk1           | 6191.97         | -0.16        | 0.41        | -0.39        | 0.700           | 0.899           |
| Sgpl1          | 2633.33         | -0.02        | 0.09        | -0.19        | 0.849           | 0.952           |
| Sgsm3          | 671.56          | 0.11         | 0.18        | 0.62         | 0.535           | 0.817           |
| Sh2b1          | 1465.56         | -0.02        | 0.09        | -0.19        | 0.848           | 0.952           |
| Shbg           | 7.25            | -0.53        | 0.65        | -0.81        | 0.416           | NA              |
| Sik1           | 2884.43         | 0.07         | 0.14        | 0.51         | 0.611           | 0.859           |
| Sim1           | 814.20          | -0.22        | 0.16        | -1.41        | 0.160           | 0.484           |
| <b>Sirpa</b>   | <b>3141.99</b>  | <b>-0.36</b> | <b>0.11</b> | <b>-3.11</b> | <b>1.89E-03</b> | <b>0.034</b>    |
| Sirt1          | 745.11          | 0.03         | 0.13        | 0.25         | 0.801           | 0.940           |
| Sirt2          | 2224.99         | 0.04         | 0.07        | 0.54         | 0.589           | 0.848           |
| Sirt3          | 2775.25         | -0.03        | 0.10        | -0.30        | 0.764           | 0.926           |
| <b>Sirt5</b>   | <b>413.49</b>   | <b>0.32</b>  | <b>0.11</b> | <b>3.04</b>  | <b>2.40E-03</b> | <b>0.039</b>    |
| Sirt6          | 266.75          | 0.11         | 0.13        | 0.88         | 0.381           | 0.720           |
| Slc11a2        | 2064.69         | 0.01         | 0.15        | 0.06         | 0.950           | 0.986           |
| Slc12a9        | 533.04          | -0.10        | 0.16        | -0.66        | 0.507           | 0.802           |
| Slc16a1        | 2675.63         | 0.34         | 0.20        | 1.73         | 0.084           | 0.351           |
| Slc16a3        | 37.14           | 0.42         | 0.77        | 0.54         | 0.588           | 0.847           |
| <b>Slc16a4</b> | <b>1447.19</b>  | <b>0.81</b>  | <b>0.11</b> | <b>7.24</b>  | <b>4.58E-13</b> | <b>4.61E-10</b> |
| Slc17a5        | 2008.03         | 0.20         | 0.07        | 2.66         | 7.85E-03        | 0.086           |
| Slc19a1        | 3891.37         | 0.05         | 0.09        | 0.57         | 0.567           | 0.837           |
| Slc1a3         | 83.98           | -0.16        | 0.23        | -0.70        | 0.484           | 0.789           |
| <b>Slc20a1</b> | <b>799.20</b>   | <b>0.54</b>  | <b>0.17</b> | <b>3.14</b>  | <b>1.68E-03</b> | <b>0.031</b>    |
| Slc22a8        | 11758.00        | -0.36        | 0.14        | -2.61        | 9.16E-03        | 0.095           |
| Slc24a3        | 32.28           | 0.57         | 0.48        | 1.18         | 0.238           | 0.590           |
| Slc25a19       | 1810.79         | 0.17         | 0.10        | 1.74         | 0.082           | 0.346           |
| Slc25a3        | 26631.53        | -0.02        | 0.07        | -0.21        | 0.831           | 0.948           |
| Slc29a2        | 125.26          | 0.21         | 0.20        | 1.05         | 0.293           | 0.643           |
| <b>Slc2a1</b>  | <b>1570.17</b>  | <b>-0.42</b> | <b>0.10</b> | <b>-4.11</b> | <b>3.91E-05</b> | <b>1.95E-03</b> |
| Slc2a2         | 8283.48         | 0.01         | 0.10        | 0.05         | 0.957           | 0.988           |
| Slc2a3         | 27.05           | -1.75        | 0.64        | -2.75        | 5.97E-03        | 0.072           |
| <b>Slc2a4</b>  | <b>965.03</b>   | <b>-0.47</b> | <b>0.12</b> | <b>-3.78</b> | <b>1.54E-04</b> | <b>5.44E-03</b> |
| Slc30a7        | 800.89          | -0.21        | 0.14        | -1.47        | 0.142           | 0.458           |
| Slc35a1        | 1113.59         | 0.00         | 0.07        | -0.02        | 0.988           | 0.996           |
| Slc35g1        | 818.62          | -0.17        | 0.14        | -1.23        | 0.217           | 0.566           |
| Slc38a4        | 197.95          | 0.06         | 0.21        | 0.29         | 0.770           | 0.928           |
| Slc39a7        | 2800.93         | -0.02        | 0.09        | -0.20        | 0.842           | 0.951           |
| Slc5a1         | 2540.93         | 0.17         | 0.11        | 1.53         | 0.126           | 0.431           |
| <b>Slc5a2</b>  | <b>20742.46</b> | <b>-0.38</b> | <b>0.08</b> | <b>-4.52</b> | <b>6.19E-06</b> | <b>4.88E-04</b> |
| Slc5a3         | 9514.18         | -0.06        | 0.14        | -0.40        | 0.686           | 0.894           |
| <b>Slc6a6</b>  | <b>12122.60</b> | <b>-0.77</b> | <b>0.12</b> | <b>-6.45</b> | <b>1.10E-10</b> | <b>5.05E-08</b> |
| Slc9a1         | 1001.32         | -0.02        | 0.17        | -0.12        | 0.905           | 0.973           |
| Slpi           | 82.94           | 1.06         | 0.87        | 1.21         | 0.225           | 0.575           |
| <b>Smad2</b>   | <b>1428.16</b>  | <b>0.37</b>  | <b>0.11</b> | <b>3.34</b>  | <b>8.44E-04</b> | <b>0.019</b>    |
| Smad3          | 1449.12         | 0.09         | 0.14        | 0.64         | 0.520           | 0.809           |
| <b>Smim1</b>   | <b>2087.13</b>  | <b>-0.31</b> | <b>0.08</b> | <b>-3.81</b> | <b>1.37E-04</b> | <b>4.97E-03</b> |

|              |                |              |             |              |                 |                 |
|--------------|----------------|--------------|-------------|--------------|-----------------|-----------------|
| Smn1         | 302.55         | 0.34         | 0.12        | 2.88         | 4.00E-03        | 0.056           |
| Smug1        | 758.23         | 0.18         | 0.20        | 0.89         | 0.376           | 0.717           |
| Snai2        | 36.38          | 0.94         | 0.34        | 2.79         | 5.23E-03        | 0.066           |
| Snap23       | 2539.00        | -0.04        | 0.10        | -0.39        | 0.698           | 0.898           |
| Snap47       | 2086.46        | 0.00         | 0.07        | -0.03        | 0.977           | 0.993           |
| Snca         | 108.43         | -0.76        | 0.29        | -2.60        | 9.34E-03        | 0.096           |
| Sned1        | 280.61         | -0.08        | 0.33        | -0.23        | 0.820           | 0.944           |
| Soat1        | 899.16         | 0.04         | 0.16        | 0.23         | 0.820           | 0.944           |
| Socs3        | 110.73         | -0.02        | 0.46        | -0.04        | 0.971           | 0.992           |
| Sod1         | 7916.71        | -0.01        | 0.09        | -0.13        | 0.899           | 0.970           |
| Sod2         | 10325.59       | 0.27         | 0.19        | 1.41         | 0.157           | 0.482           |
| Sord         | 82573.51       | -0.01        | 0.08        | -0.16        | 0.871           | 0.961           |
| <b>Sort1</b> | <b>1810.76</b> | <b>-0.36</b> | <b>0.10</b> | <b>-3.66</b> | <b>2.54E-04</b> | <b>8.05E-03</b> |
| Sp1          | 2476.26        | -0.06        | 0.11        | -0.54        | 0.592           | 0.849           |
| Sparc        | 2565.33        | 0.42         | 0.17        | 2.48         | 0.013           | 0.120           |
| Sphk1        | 234.35         | -0.35        | 0.21        | -1.64        | 0.100           | 0.383           |
| Spp1         | 39107.25       | -0.30        | 0.13        | -2.29        | 0.022           | 0.162           |
| Src          | 1203.12        | -0.09        | 0.10        | -0.88        | 0.380           | 0.720           |
| Srebf1       | 1364.15        | -0.11        | 0.14        | -0.82        | 0.409           | 0.739           |
| Srebf2       | 2739.17        | -0.17        | 0.10        | -1.66        | 0.097           | 0.377           |
| Srsf10       | 1367.99        | 0.35         | 0.13        | 2.77         | 5.69E-03        | 0.070           |
| Srxn1        | 3054.85        | 0.21         | 0.11        | 1.94         | 0.053           | 0.274           |
| St13         | 8961.11        | 0.31         | 0.11        | 2.84         | 4.53E-03        | 0.061           |
| St3gal4      | 307.71         | -0.26        | 0.19        | -1.34        | 0.181           | 0.515           |
| Stam         | 1237.00        | 0.20         | 0.11        | 1.87         | 0.061           | 0.295           |
| Stap2        | 133.29         | -0.17        | 0.20        | -0.88        | 0.378           | 0.718           |
| Stat3        | 3401.43        | 0.11         | 0.22        | 0.50         | 0.617           | 0.861           |
| Stat5a       | 637.32         | -0.11        | 0.15        | -0.75        | 0.454           | 0.770           |
| Stk11        | 2101.95        | -0.09        | 0.11        | -0.86        | 0.392           | 0.727           |
| Stk24        | 1741.94        | -0.19        | 0.10        | -1.93        | 0.054           | 0.277           |
| Suv39h1      | 408.52         | -0.12        | 0.13        | -0.94        | 0.348           | 0.692           |
| Tat          | 7.55           | 1.94         | 1.24        | 1.56         | 0.119           | NA              |
| Tbc1d1       | 5907.38        | -0.09        | 0.06        | -1.41        | 0.159           | 0.483           |
| Tbxa2r       | 72.68          | -0.39        | 0.30        | -1.29        | 0.197           | 0.537           |
| <b>Tcf21</b> | <b>469.80</b>  | <b>0.71</b>  | <b>0.20</b> | <b>3.54</b>  | <b>4.04E-04</b> | <b>0.011</b>    |
| Tcf3         | 834.45         | -0.06        | 0.12        | -0.50        | 0.615           | 0.861           |
| Tcf7l2       | 411.60         | -0.09        | 0.17        | -0.50        | 0.616           | 0.861           |
| <b>Tek</b>   | <b>923.47</b>  | <b>0.48</b>  | <b>0.15</b> | <b>3.12</b>  | <b>1.81E-03</b> | <b>0.033</b>    |
| Tfam         | 1727.96        | 0.05         | 0.14        | 0.38         | 0.701           | 0.900           |
| Tfe3         | 789.95         | 0.15         | 0.10        | 1.45         | 0.147           | 0.466           |
| Tfrc         | 2112.71        | -0.02        | 0.14        | -0.15        | 0.882           | 0.964           |
| Tg           | 6.98           | 0.33         | 0.73        | 0.45         | 0.652           | NA              |
| Tgfb1        | 286.65         | 0.50         | 0.19        | 2.69         | 7.19E-03        | 0.082           |
| Tgfb3        | 45.61          | 0.68         | 0.32        | 2.10         | 0.036           | 0.219           |
| Tgm2         | 10127.54       | -0.04        | 0.10        | -0.42        | 0.676           | 0.891           |

|              |               |             |             |             |                 |                 |
|--------------|---------------|-------------|-------------|-------------|-----------------|-----------------|
| Thbs1        | 2965.59       | 0.33        | 0.12        | 2.67        | 7.48E-03        | 0.084           |
| <b>Thbs2</b> | <b>151.32</b> | <b>0.83</b> | <b>0.22</b> | <b>3.68</b> | <b>2.34E-04</b> | <b>7.53E-03</b> |
| Thrap3       | 2967.12       | 0.15        | 0.11        | 1.43        | 0.154           | 0.477           |
| Ticam1       | 938.70        | 0.04        | 0.10        | 0.44        | 0.663           | 0.884           |
| Timp1        | 8.27          | 0.69        | 0.90        | 0.77        | 0.440           | NA              |
| Timp2        | 823.84        | 0.09        | 0.16        | 0.54        | 0.590           | 0.848           |
| Timp3        | 51567.36      | 0.09        | 0.10        | 0.95        | 0.342           | 0.687           |
| Tkt          | 8644.15       | 0.09        | 0.08        | 1.13        | 0.259           | 0.611           |
| Tlr1         | 27.35         | -0.68       | 0.48        | -1.43       | 0.154           | 0.477           |
| Tlr2         | 106.34        | -0.18       | 0.29        | -0.62       | 0.538           | 0.819           |
| Tlr4         | 126.49        | 0.02        | 0.22        | 0.10        | 0.917           | 0.976           |
| Tm7sf2       | 333.03        | 0.02        | 0.18        | 0.09        | 0.932           | 0.980           |
| Tmprss2      | 5715.34       | -0.10       | 0.07        | -1.35       | 0.177           | 0.512           |
| Tnf          | 6.96          | 0.41        | 1.08        | 0.38        | 0.702           | NA              |
| Tnfrsf11b    | 15.90         | 1.06        | 0.89        | 1.20        | 0.231           | 0.582           |
| Tnfrsf14     | 23.38         | -0.01       | 0.52        | -0.01       | 0.988           | 0.996           |
| Tnfrsf1a     | 1759.99       | 0.01        | 0.10        | 0.15        | 0.877           | 0.963           |
| Tnfrsf1b     | 164.65        | 0.20        | 0.32        | 0.63        | 0.526           | 0.813           |
| Tnfsf10      | 1277.50       | 0.11        | 0.17        | 0.66        | 0.510           | 0.804           |
| Tnfsf14      | 6.33          | 0.66        | 0.84        | 0.79        | 0.431           | NA              |
| Tpt1         | 30595.42      | 0.00        | 0.09        | -0.05       | 0.961           | 0.990           |
| <b>Trib3</b> | <b>28.39</b>  | <b>1.63</b> | <b>0.53</b> | <b>3.09</b> | <b>1.97E-03</b> | <b>0.035</b>    |
| Trpc3        | 35.68         | 0.45        | 0.34        | 1.32        | 0.186           | 0.522           |
| Trpc6        | 14.76         | -0.45       | 0.52        | -0.87       | 0.382           | 0.721           |
| Trpm7        | 5961.18       | -0.15       | 0.07        | -2.06       | 0.039           | 0.231           |
| Trpv4        | 3264.67       | 0.14        | 0.09        | 1.61        | 0.107           | 0.395           |
| Tsc2         | 3522.15       | -0.12       | 0.13        | -0.95       | 0.341           | 0.686           |
| Tsc22d4      | 1474.03       | 0.18        | 0.14        | 1.28        | 0.200           | 0.541           |
| Tspo         | 2552.94       | -0.10       | 0.12        | -0.84       | 0.401           | 0.733           |
| Ttr          | 61.21         | -0.28       | 0.43        | -0.66       | 0.511           | 0.804           |
| Tvp23b       | 1296.06       | -0.01       | 0.08        | -0.14       | 0.889           | 0.967           |
| Txn2         | 5476.58       | -0.06       | 0.10        | -0.60       | 0.550           | 0.826           |
| Txnip        | 9887.67       | -0.19       | 0.16        | -1.20       | 0.232           | 0.583           |
| Ube2v1       | 3455.15       | -0.08       | 0.05        | -1.53       | 0.126           | 0.430           |
| Ucp2         | 2068.15       | 0.04        | 0.15        | 0.25        | 0.801           | 0.940           |
| Ugcg         | 424.03        | -0.06       | 0.13        | -0.42       | 0.672           | 0.890           |
| Ulk1         | 2345.64       | -0.09       | 0.14        | -0.66       | 0.508           | 0.802           |
| Unc13a       | 36.95         | 1.08        | 0.49        | 2.22        | 0.026           | 0.182           |
| Unc13b       | 652.28        | 0.01        | 0.13        | 0.04        | 0.967           | 0.991           |
| Usp14        | 1266.38       | 0.18        | 0.09        | 1.99        | 0.047           | 0.255           |
| Utrn         | 2491.85       | -0.09       | 0.15        | -0.60       | 0.547           | 0.825           |
| Vasp         | 931.87        | 0.06        | 0.11        | 0.52        | 0.600           | 0.853           |
| Vat1         | 1946.31       | 0.11        | 0.08        | 1.41        | 0.158           | 0.483           |
| Vcam1        | 269.64        | 0.08        | 0.28        | 0.29        | 0.773           | 0.929           |
| Vcan         | 39.85         | 0.41        | 0.48        | 0.85        | 0.395           | 0.729           |

|        |          |       |      |       |          |       |
|--------|----------|-------|------|-------|----------|-------|
| Vdac1  | 22212.76 | 0.07  | 0.07 | 0.99  | 0.324    | 0.672 |
| Vdac2  | 8374.89  | -0.05 | 0.06 | -0.79 | 0.432    | 0.753 |
| Vdr    | 9048.15  | 0.10  | 0.13 | 0.76  | 0.448    | 0.765 |
| Vegfa  | 3801.07  | -0.12 | 0.12 | -0.99 | 0.324    | 0.671 |
| Vegfb  | 1203.62  | 0.02  | 0.08 | 0.25  | 0.801    | 0.940 |
| Vegfc  | 78.12    | 0.45  | 0.30 | 1.51  | 0.132    | 0.439 |
| Vim    | 964.87   | 0.15  | 0.17 | 0.90  | 0.368    | 0.710 |
| Vps51  | 1033.84  | 0.02  | 0.11 | 0.21  | 0.833    | 0.949 |
| Vwf    | 130.57   | -1.31 | 0.56 | -2.35 | 0.019    | 0.150 |
| Wfs1   | 634.09   | 0.16  | 0.13 | 1.28  | 0.199    | 0.540 |
| Wnk1   | 17910.68 | -0.02 | 0.11 | -0.21 | 0.836    | 0.949 |
| Xiap   | 2439.64  | -0.04 | 0.08 | -0.45 | 0.649    | 0.878 |
| Xpr1   | 3671.23  | -0.12 | 0.10 | -1.13 | 0.259    | 0.610 |
| Ywhaz  | 15938.34 | 0.18  | 0.07 | 2.59  | 9.61E-03 | 0.097 |
| Yy1    | 2619.15  | 0.17  | 0.14 | 1.24  | 0.214    | 0.561 |
| Zbtb7c | 109.78   | -0.51 | 0.21 | -2.43 | 0.015    | 0.130 |
| Zdhhc7 | 1131.51  | 0.02  | 0.09 | 0.18  | 0.855    | 0.955 |
| Zeb1   | 338.89   | -0.12 | 0.45 | -0.27 | 0.788    | 0.934 |
| Zfp69  | 149.09   | -0.21 | 0.17 | -1.23 | 0.217    | 0.566 |

**Supplementary Table 2:** List of differentially expressed genes in CHOP-ASO (ChA) versus PBS treated (PBS) db/db mice in the hyperglycemia gene set.

**GeneSymbol:** HGNC gene symbol; **baseMean:** mean of normalized counts for all samples  
**log2FoldChange:** log2 fold change; **lfcSE:** standard error; **stat:** Wald statistic; **pvalue:** Wald test p-value; **padj:** BH adjusted p-values; Genes showing an adjusted p-value <0.05 are depicted in bold.

## List of reagents (used in current study)

### Antibodies

| Target antigen                                                                        | Vendor or Source          | Catalog #  | Working concentration | Persistent ID / URL                                                                                                                                                                                                                                                                   |
|---------------------------------------------------------------------------------------|---------------------------|------------|-----------------------|---------------------------------------------------------------------------------------------------------------------------------------------------------------------------------------------------------------------------------------------------------------------------------------|
| anti-TIM-1                                                                            | Abcam                     | ab47635    | 1:500                 | <a href="https://www.abcam.com/tim-1-antibody-ab47635.html">https://www.abcam.com/tim-1-antibody-ab47635.html</a>                                                                                                                                                                     |
| anti-ATF6                                                                             | Santa Cruz Biotechnology  | sc-166659  | 1:500                 | <a href="https://www.scbt.com/de/p/atf-6alpha-antibody-f-7">https://www.scbt.com/de/p/atf-6alpha-antibody-f-7</a>                                                                                                                                                                     |
| anti-GADD153/CHOP                                                                     | Novus Biologicals         | NB600-1335 | 1:1000                | <a href="https://www.novusbio.com/primary-antibodies/gadd153-chop">https://www.novusbio.com/primary-antibodies/gadd153-chop</a>                                                                                                                                                       |
| anti-SGLT2                                                                            | Invitrogen                | PA5-75567  | 1:500                 | <a href="https://www.thermofisher.com/antibody/product/SGLT2-Antibody-Polyclonal/PA5-75567">https://www.thermofisher.com/antibody/product/SGLT2-Antibody-Polyclonal/PA5-75567</a>                                                                                                     |
| Cleaved-caspase 3                                                                     | Cell Signaling Technology | 9661       | 1:1000                | <a href="https://www.cellsignal.com/products/primary-antibodies/cleaved-caspase-3-asp175-antibody/9661">https://www.cellsignal.com/products/primary-antibodies/cleaved-caspase-3-asp175-antibody/9661</a>                                                                             |
| Mouse anti-CD133 (PROM1)                                                              | Biorbyt                   | orb372326  | 1:1000                | <a href="https://www.biorbyt.com/cd133-antibody-orb372326.html">https://www.biorbyt.com/cd133-antibody-orb372326.html</a>                                                                                                                                                             |
| Mouse anti- Synaptopodin                                                              | Santa Cruz Biotechnology  | sc-515842  | 1:50                  | <a href="https://www.scbt.com/p/synaptopodin-antibody-d-9">https://www.scbt.com/p/synaptopodin-antibody-d-9</a>                                                                                                                                                                       |
| Rabbit anti-GAPDH                                                                     | Sigma Aldrich             | G9545      | 1:10000               | <a href="https://www.sigmaaldrich.com/catalog/product/sigma/g9545?lang=en&amp;region=CA">https://www.sigmaaldrich.com/catalog/product/sigma/g9545?lang=en&amp;region=CA</a>                                                                                                           |
| Anti-mouse IgG, HRP-linked Antibody                                                   | Cell Signaling Technology | 7076       | 1:4000                | <a href="https://www.cellsignal.com/products/secondary-antibodies/anti-mouse-igg-hrp-linked-antibody/7076?site-search-type=Products">https://www.cellsignal.com/products/secondary-antibodies/anti-mouse-igg-hrp-linked-antibody/7076?site-search-type=Products</a>                   |
| Anti-rabbit IgG, HRP-linked Antibody                                                  | Cell Signaling Technology | 7074       | 1:4000                | <a href="https://www.cellsignal.com/products/secondary-antibodies/anti-rabbit-igg-hrp-linked-antibody/7074?site-search-type=Products">https://www.cellsignal.com/products/secondary-antibodies/anti-rabbit-igg-hrp-linked-antibody/7074?site-search-type=Products</a>                 |
| Donkey Anti-Rabbit IgG H&L (Alexa Fluor® 594)                                         | abcam                     | ab150076   | 1:400                 | <a href="https://www.abcam.com/donkey-rabbit-igg-hl-alex-fluor-594-ab150076.html">https://www.abcam.com/donkey-rabbit-igg-hl-alex-fluor-594-ab150076.html</a>                                                                                                                         |
| Donkey anti-Mouse IgG (H+L) Highly Cross-Adsorbed Secondary Antibody, Alexa Fluor 488 | Thermo Fisher Scientific  | A-21202    | 1:400                 | <a href="https://www.thermofisher.com/antibody/product/Donkey-anti-Mouse-IgG-H-L-Highly-Cross-Adsorbed-Secondary-Antibody-Polyclonal/A-21202">https://www.thermofisher.com/antibody/product/Donkey-anti-Mouse-IgG-H-L-Highly-Cross-Adsorbed-Secondary-Antibody-Polyclonal/A-21202</a> |

### Reagents and Kits

| Reagents                             | Vendor or Source | Catalog # | Persistent ID / URL                                                                                                                                                                                                               |
|--------------------------------------|------------------|-----------|-----------------------------------------------------------------------------------------------------------------------------------------------------------------------------------------------------------------------------------|
| Hematoxylin solution acc. to Gill II | CARL ROTH        | T864.2    | <a href="https://www.carlroth.com/com/en/cytological-routine-staining/hematoxylin-solution-acc-to-gill-ii/p/t864.2">https://www.carlroth.com/com/en/cytological-routine-staining/hematoxylin-solution-acc-to-gill-ii/p/t864.2</a> |
| Agarose Standard                     | CARL ROTH        | 3810.3    | <a href="https://www.carlroth.com/com/en/agarose-gelling-reagents/agarose-standard/p/3810.3">https://www.carlroth.com/com/en/agarose-gelling-reagents/agarose-standard/p/3810.3</a>                                               |

|                                                 |                     |               |                                                                                                                                                                                                                                                                                                                                                                     |
|-------------------------------------------------|---------------------|---------------|---------------------------------------------------------------------------------------------------------------------------------------------------------------------------------------------------------------------------------------------------------------------------------------------------------------------------------------------------------------------|
| Aqueous Mounting Medium                         | ZYTOMED             | ZY-AMT030     | <a href="https://www.zycomed-systems.com/storage/uploads/data_sheets/en/ZY-AMT_EN.pdf">https://www.zycomed-systems.com/storage/uploads/data_sheets/en/ZY-AMT_EN.pdf</a>                                                                                                                                                                                             |
| Takyon™ Rox SYBR Core Kit blue dTTP             | Takyon              | UF-RSCT-B0201 | <a href="https://www.eurogentec.com/en/catalog/takyon-rox-sybr-core-kit-blue-dttp~b177cfd-fbb9a-4893-8b7f-f49288f8bab4">https://www.eurogentec.com/en/catalog/takyon-rox-sybr-core-kit-blue-dttp~b177cfd-fbb9a-4893-8b7f-f49288f8bab4</a>                                                                                                                           |
| Trichrome Stain (Masson) Kit                    | Sigma Aldrich       | HT15          | <a href="https://www.sigmaaldrich.com/catalog/product/sigma/ht15?lang=en&amp;region=CA">https://www.sigmaaldrich.com/catalog/product/sigma/ht15?lang=en&amp;region=CA</a>                                                                                                                                                                                           |
| RNeasy Mini Kit                                 | QIAGEN              | 74106         | <a href="https://www.qiagen.com/de/shop/sample-technologies/rna/rneasy-mini-kit/">https://www.qiagen.com/de/shop/sample-technologies/rna/rneasy-mini-kit/</a>                                                                                                                                                                                                       |
| cDNA synthesis Kit                              | Invitrogen          | 18080051      | <a href="https://www.thermofisher.com/order/catalog/product/18080051?SID=srch-hj-18080051#/18080051?SID=srch-hj-18080051">https://www.thermofisher.com/order/catalog/product/18080051?SID=srch-hj-18080051#/18080051?SID=srch-hj-18080051</a>                                                                                                                       |
| Pierce™ BCA protein assay kit                   | Perbio Science      | 23227         | <a href="https://www.thermofisher.com/order/catalog/product/23227#/23227">https://www.thermofisher.com/order/catalog/product/23227#/23227</a>                                                                                                                                                                                                                       |
| Vector shield mounting medium with DAPI         | Vector Laboratories | H-1200-10     | <a href="https://vectorlabs.com/vectashield-r-plus-antifade-mounting-medium-with-dapi.html">https://vectorlabs.com/vectashield-r-plus-antifade-mounting-medium-with-dapi.html</a>                                                                                                                                                                                   |
| PVDF membrane                                   | Merck Millipore     | IPVH00010     | <a href="https://www.merckmillipore.com/DE/de/search/IPVH00010?search=&amp;TrackingSearchType=SB+-+homepage-search-box+-+OLD&amp;SearchContextPageletUUID=&amp;SearchTerm=IPVH00010">https://www.merckmillipore.com/DE/de/search/IPVH00010?search=&amp;TrackingSearchType=SB+-+homepage-search-box+-+OLD&amp;SearchContextPageletUUID=&amp;SearchTerm=IPVH00010</a> |
| Immobilion™ chemiluminescent HRP substrate      | Merck Millipore     | WBKLS0500     | <a href="https://www.merckmillipore.com/DE/de/search/WBKLS0500?search=&amp;TrackingSearchType=SB+-+Search+Result+Search+Box&amp;SearchContextPageletUUID=&amp;SearchTerm=WBKLS0500">https://www.merckmillipore.com/DE/de/search/WBKLS0500?search=&amp;TrackingSearchType=SB+-+Search+Result+Search+Box&amp;SearchContextPageletUUID=&amp;SearchTerm=WBKLS0500</a>   |
| Powdered milk                                   | CARL ROTH           | T145.2        | <a href="https://www.carlroth.com/de/de/blockierungsreagenzien/milchpulver/p/t145.2">https://www.carlroth.com/de/de/blockierungsreagenzien/milchpulver/p/t145.2</a>                                                                                                                                                                                                 |
| Albumin fraction                                | CARL ROTH           | 8076.2        | <a href="https://www.carlroth.com/de/de/blockierungsreagenzien/albumin-fraktion-v/p/8076.2">https://www.carlroth.com/de/de/blockierungsreagenzien/albumin-fraktion-v/p/8076.2</a>                                                                                                                                                                                   |
| Rotiphorese® Gel                                | CARL ROTH           | 3029.1        | <a href="https://www.carlroth.com/de/de/page-fertigloesungen/rotiphorese-gel-30-%28375%3A1%29/p/3029.1">https://www.carlroth.com/de/de/page-fertigloesungen/rotiphorese-gel-30-%28375%3A1%29/p/3029.1</a>                                                                                                                                                           |
| Donkey serum                                    | Sigma Aldrich       | D9663         | <a href="https://www.sigmaaldrich.com/catalog/product/sigma/d9663?lang=en&amp;region=CA">https://www.sigmaaldrich.com/catalog/product/sigma/d9663?lang=en&amp;region=CA</a>                                                                                                                                                                                         |
| TrueBlack® Lipofuscin autofluorescence quencher | Biotium             | 23007         | <a href="https://biotium.com/product/true-black-lipofuscin-autofluorescence-quencher/">https://biotium.com/product/true-black-lipofuscin-autofluorescence-quencher/</a>                                                                                                                                                                                             |
| Trizol Reagent                                  | Life Technologies   | 15596018      | <a href="https://www.thermofisher.com/order/catalog/product/15596018?SID=srch-hj-">https://www.thermofisher.com/order/catalog/product/15596018?SID=srch-hj-</a>                                                                                                                                                                                                     |

|                                |                          |                |                                                                                                                                                                                                                                               |
|--------------------------------|--------------------------|----------------|-----------------------------------------------------------------------------------------------------------------------------------------------------------------------------------------------------------------------------------------------|
|                                |                          |                | 15596018#/15596018?SID=srch-hj-15596018                                                                                                                                                                                                       |
| Phosphate Buffer Saline (PBS)  | Thermo Fisher Scientific | 10-010-031     | <a href="https://www.thermofisher.com/order/catalog/product/10010031?SID=srch-hj-10010031#/10010031?SID=srch-hj-10010031">https://www.thermofisher.com/order/catalog/product/10010031?SID=srch-hj-10010031#/10010031?SID=srch-hj-10010031</a> |
| Rompun 2%                      | Bayer                    |                | <a href="https://covetrus.de/a/rompun-2prozent-flasche-25-ml/02.2049.25256.770081">https://covetrus.de/a/rompun-2prozent-flasche-25-ml/02.2049.25256.770081</a>                                                                               |
| Ketamine                       | Beta-pharm               |                | <a href="https://www.betapharm.de/Ketamin">https://www.betapharm.de/Ketamin</a>                                                                                                                                                               |
| Tween-20                       | CARL ROTH                | 9127.1         | <a href="https://www.carlroth.com/de/de/reagenzien-zur-dna-rna-analyse/tween-20/p/9127.1">https://www.carlroth.com/de/de/reagenzien-zur-dna-rna-analyse/tween-20/p/9127.1</a>                                                                 |
| 2-Propanol                     | CARL ROTH                | CP41.1         | <a href="https://www.carlroth.com/de/de/von-a-bis-z/2-propanol/p/cp41.1">https://www.carlroth.com/de/de/von-a-bis-z/2-propanol/p/cp41.1</a>                                                                                                   |
| HBSS                           | Thermo Fisher Scientific | 14025-050      | <a href="https://www.thermofisher.com/order/catalog/product/14025100#/14025100">https://www.thermofisher.com/order/catalog/product/14025100#/14025100</a>                                                                                     |
| Protease Inhibitor Cocktail    | Roche Diagnostics        | 11 836 153 001 | <a href="https://www.sigmaaldrich.com/catalog/product/roche/11836153001?lang=en&amp;region=CA">https://www.sigmaaldrich.com/catalog/product/roche/11836153001?lang=en&amp;region=CA</a>                                                       |
| ACCU-CHEK glucometer           | Roche Diagnostics        | 447470         | <a href="https://www.medicalexpo.de/product/roche/product-71020-447470.html">https://www.medicalexpo.de/product/roche/product-71020-447470.html</a>                                                                                           |
| ACCU-CHEK blood glucose strips | Roche Diagnostics        | 05942861       | <a href="https://www.vitalisto.de/accu-chek-inform-ii-teststreifen-quantitative-blutzuckerbestimmung">https://www.vitalisto.de/accu-chek-inform-ii-teststreifen-quantitative-blutzuckerbestimmung</a>                                         |



## References (related to supplementary material)

1. Love MI, Huber W, Anders S: Moderated estimation of fold change and dispersion for RNA-seq data with DESeq2. *Genome biology*, 15: 550, 2014 10.1186/s13059-014-0550-8
2. Isermann B, Vinnikov IA, Madhusudhan T, Herzog S, Kashif M, Blautzik J, et al.: Activated protein C protects against diabetic nephropathy by inhibiting endothelial and podocyte apoptosis. *Nature medicine*, 13: 1349-1358, 2007 10.1038/nm1667
3. Madhusudhan T, Wang H, Dong W, Ghosh S, Bock F, Thangapandi VR, et al.: Defective podocyte insulin signalling through p85-XBP1 promotes ATF6-dependent maladaptive ER-stress response in diabetic nephropathy. *Nature communications*, 6: 6496, 2015 10.1038/ncomms7496
4. Marquardt A, Al-Dabet MM, Ghosh S, Kohli S, Manoharan J, ElWakiel A, et al.: Farnesoid X Receptor Agonism Protects against Diabetic Tubulopathy: Potential Add-On Therapy for Diabetic Nephropathy. *Journal of the American Society of Nephrology : JASN*, 28: 3182-3189, 2017 10.1681/ASN.2016101123
5. Shahzad K, Bock F, Dong W, Wang H, Kopf S, Kohli S, et al.: Nlrp3-inflammasome activation in non-myeloid-derived cells aggravates diabetic nephropathy. *Kidney international*, 87: 74-84, 2015 10.1038/ki.2014.271
6. Bock F, Shahzad K, Wang H, Stoyanov S, Wolter J, Dong W, et al.: Activated protein C ameliorates diabetic nephropathy by epigenetically inhibiting the redox enzyme p66Shc. *Proceedings of the National Academy of Sciences of the United States of America*, 110: 648-653, 2013 10.1073/pnas.1218667110
7. Gadi I, Fatima S, Elwakiel A, Nazir S, Al-Dabet MM, Rana R, et al.: Different DOACs Control Inflammation in Cardiac Ischemia-Reperfusion Differently. *Circulation research*, 2020 10.1161/CIRCRESAHA.120.317219
8. Kohli S, Ranjan S, Hoffmann J, Kashif M, Daniel EA, Al-Dabet MM, et al.: Maternal extracellular vesicles and platelets promote preeclampsia via inflammasome activation in trophoblasts. *Blood*, 128: 2153-2164, 2016 10.1182/blood-2016-03-705434
9. Bolger AM, Lohse M, Usadel B: Trimmomatic: a flexible trimmer for Illumina sequence data. *Bioinformatics*, 30: 2114-2120, 2014 10.1093/bioinformatics/btu170
10. Frankish A, Diekhans M, Ferreira AM, Johnson R, Jungreis I, Loveland J, et al.: GENCODE reference annotation for the human and mouse genomes. *Nucleic acids research*, 47: D766-D773, 2019 10.1093/nar/gky955
11. Patro R, Duggal G, Love MI, Irizarry RA, Kingsford C: Salmon provides fast and bias-aware quantification of transcript expression. *Nature methods*, 14: 417-419, 2017 10.1038/nmeth.4197
12. Soneson C, Love MI, Robinson MD: Differential analyses for RNA-seq: transcript-level estimates improve gene-level inferences. *F1000Research*, 4: 1521, 2015 10.12688/f1000research.7563.2
13. Lawrence M, Huber W, Pages H, Aboyoun P, Carlson M, Gentleman R, et al.: Software for computing and annotating genomic ranges. *PLoS computational biology*, 9: e1003118, 2013 10.1371/journal.pcbi.1003118
14. Pinero J, Ramirez-Anguita JM, Sauch-Pitarch J, Ronzano F, Centeno E, Sanz F, et al.: The DisGeNET knowledge platform for disease genomics: 2019 update. *Nucleic acids research*, 48: D845-D855, 2020 10.1093/nar/gkz1021
15. Chen H, Boutros PC: VennDiagram: a package for the generation of highly-customizable Venn and Euler diagrams in R. *BMC bioinformatics*, 12: 35, 2011 10.1186/1471-2105-12-35
